# Supplementary material for: SMYD3 Impedes Small Cell Lung Cancer Sensitivity to Alkylation Damage through RNF113A Methylation–Phosphorylation Cross-talk
Source: PubMed Central journal article supplement (PMC9437563; doi:10.1158/2159-8290.cd-21-0205), 2022-07-12
Supplement: cd-21-0205_supplementary_data_7_suppsd7.pdf [file cd-21-0205_supplementary_data_7_suppsd7.pdf]

## Supplementary Figure 7

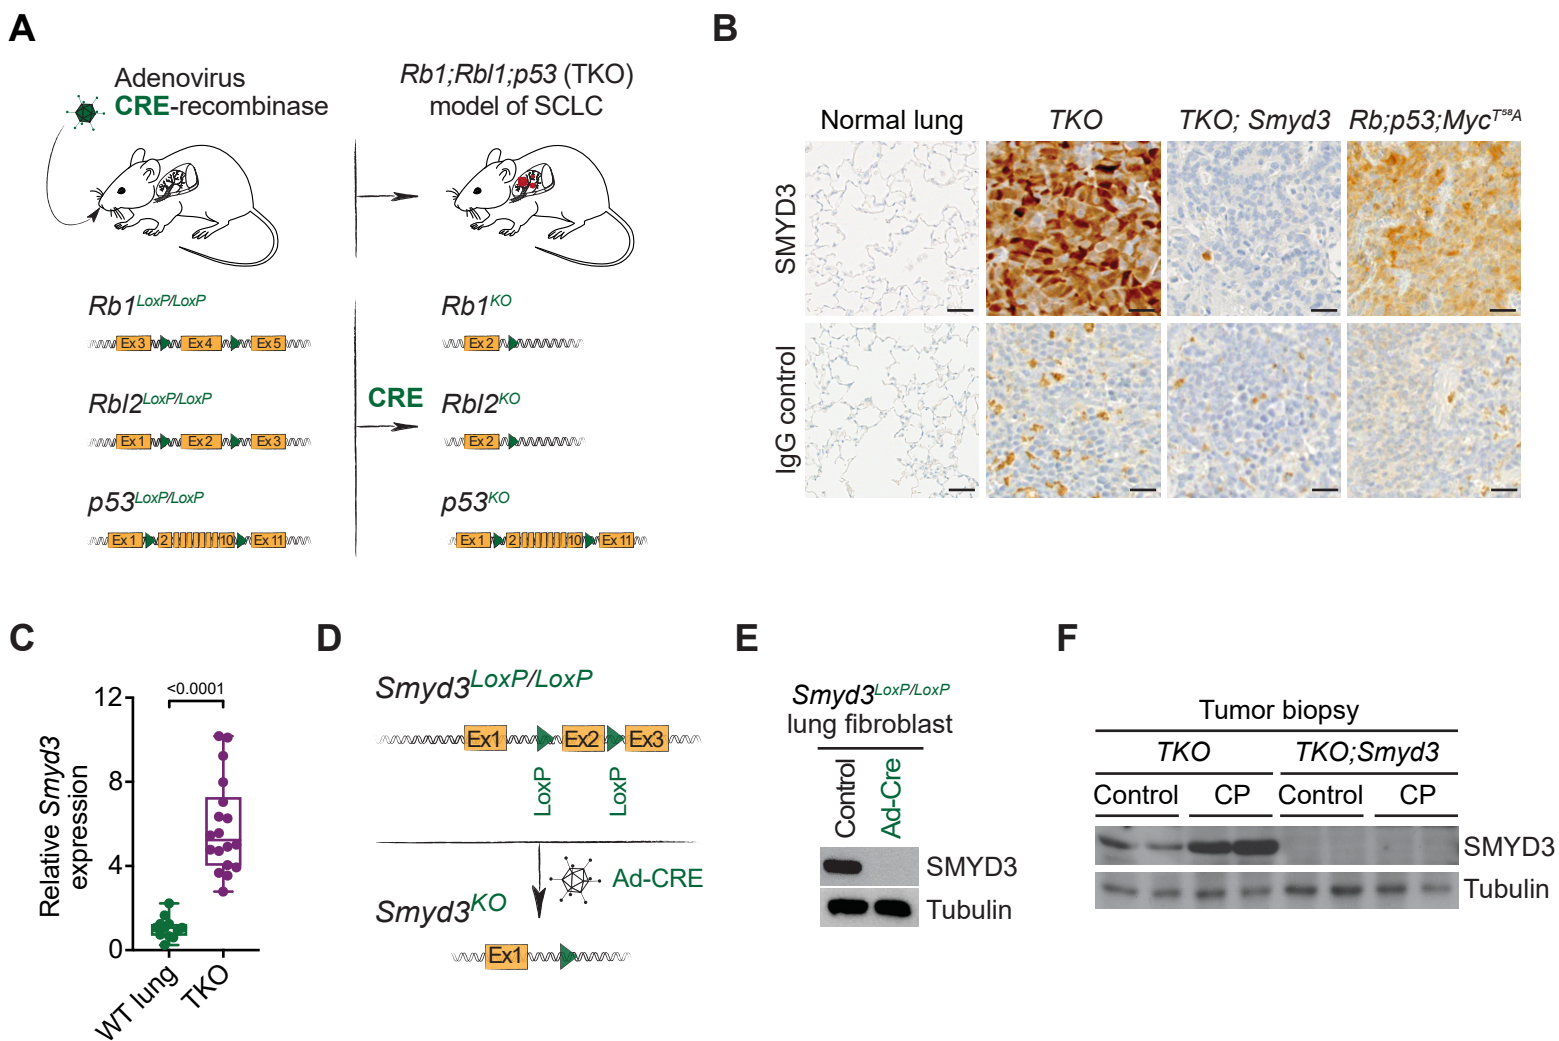

### Supplementary Figure S7. SMYD3 inhibition sensitizes SCLC to alkylating agents *in vivo*

**A**, Schematic of the SCLC mouse model that recapitulates canonical genetic alterations that co-occur in human disease. The triple knockout (TKO) model was generated by breeding mice that carry conditional deletion of *Rb1*<sup>LoxP/LoxP</sup>, *Rb2*<sup>LoxP/LoxP</sup> and *Tp53*<sup>LoxP/LoxP</sup>. Tumorigenesis in mice is induced by intratracheal installation of adenovirus expressing Cre-recombinase (Ad-Cre). **B**, Representative IHC staining of normal lung tissue and TKO and RPM (*Rb*<sup>LoxP/LoxP</sup>; *p53*<sup>LoxP/LoxP</sup>; *H11*<sup>LSL-MycT58A</sup>) SCLC mouse models (representative of  $n = 12$  samples for each group). Of note all analyzed TKO and RPM samples showed nuclear and cytoplasmic SMYD3 expression with H-score >150. Tumors in TKO;*Smyd3* mutant mice were negative for SMYD3 expression which confirms correct Cre-recombination of mutant allele. Scale bars, 50  $\mu$ m. **C**, *Smyd3* expression in wildtype lung and TKO tumor samples by RTq-PCR,  $n = 12$  samples for each group. *P*-values were calculated by two-tailed unpaired t-test. **D**, Schematic of the *Smyd3* conditional allele. In the presence of Cre recombinase, exon 2 is deleted to disrupt *Smyd3* expression. **E**, Immunoblot analysis with the indicated antibodies of lysates from *Smyd3*<sup>LoxP/LoxP</sup> lung fibroblasts transduced with Ad-Cre or vehicle (control). Tubulin is shown as a loading control. **F**, Immunoblot analysis with the indicated antibodies of tumor biopsy lysates from TKO and TKO;*Smyd3* mutant mice treated with cyclophosphamide (CP) or vehicle (control). Two independent and representative samples are shown for each condition. Tubulin is shown as a loading control.
