# Supplementary material for: SMYD3 Impedes Small Cell Lung Cancer Sensitivity to Alkylation Damage through RNF113A Methylation–Phosphorylation Cross-talk
Source: Cancer Discov. 2022 Jul 12;12(9):2158–79. doi: 10.1158/2159-8290.CD-21-0205 (PMC9437563; doi:10.1158/2159-8290.CD-21-0205)
Supplement: Supplementary Table [file cd-21-0205_supplementary_table_s3_suppst3.xlsx]

## Sheet: RNF113A interactors
Supplementary table 3: List of identified proteins binding to RNF113A-K20me0 and RNF113A-K20me3 peptides in the peptide-pulldown quantitative proteomics analysis. Two independent experiments using forward (Heavy: RNF113A-K20me3, Light: RNF113A-K20me0) and reverse (Heavy: RNF113A-K20me0, Light: RNF113A-K20me3) labeling were performed.
Majority protein IDs	Protein names	Gene names	Mol. weight [kDa]	Razor + unique peptides forward	Razor + unique peptides reverse	Ratio H/L normalized forward	Ratio H/L normalized reverse	Log2 Ratio H/L normalized forward	Log2 Ratio H/L normalized reverse
Q6IN85;A0A024R6M2;G3V5Z3;H0YIY8	Serine/threonine-protein phosphatase 4 regulatory subunit 3A	PPP4R3A;KIAA2010	95.367	18	14	0.044097	24.92	-4.50318	4.63923
H3BTA2;Q5U086;A0A024R625;P60510;H3BV22	Serine/threonine-protein phosphatase;Serine/threonine-protein phosphatase 4 catalytic subunit	PPP4C	30.561	6	4	0.087759	4.6352	-3.51031	2.21263
Q9NY27;C9IZ04	Serine/threonine-protein phosphatase 4 regulatory subunit 2	PPP4R2	46.898	21	23	0.096936	13.926	-3.36682	3.79971
Q5MIZ7;B4DKA9	Serine/threonine-protein phosphatase 4 regulatory subunit 3B	PPP4R3B	97.457	4	3	0.11499	4.0521	-3.12042	2.01867
B2R7M3;A0A024QZY1;Q13155;F8W950;A8MU58	Aminoacyl tRNA synthase complex-interacting multifunctional protein 2	JTV1;AIMP2	35.448	5	5	0.14644	6.8268	-2.77162	2.77121
A0A140VJW5;P14868;D3DP78;Q53T60	Aspartate--tRNA ligase, cytoplasmic	DARS	57.136	20	19	0.18587	6.9258	-2.42763	2.79198
Q15149	Plectin	PLEC	531.78	2	27	0.18617	4.9531	-2.42531	2.30833
V9HWE1;P08670;Q53HU8;B0YJC4;B3KRK8	Vimentin	HEL113;VIM	53.651	9	27	0.19241	227.88	-2.37774	7.83213
P54136;B4DXW6	Arginine--tRNA ligase, cytoplasmic	RARS	75.378	39	36	0.19975	6.1796	-2.32373	2.62751
Q07021;I3L3Q7;I3L3B0;A8K651	Complement component 1 Q subcomponent-binding protein, mitochondrial	C1QBP	31.362	7	6	0.20203	3.9532	-2.30736	1.98302
Q12904;B4DNK3	Aminoacyl tRNA synthase complex-interacting multifunctional protein 1;Endothelial monocyte-activating polypeptide 2	AIMP1	34.352	19	17	0.21016	5.2126	-2.25044	2.382
A0A024QZ47;Q92624	Amyloid protein-binding protein 2	APPBP2	66.853	7	7	0.21146	2.0837	-2.24154	1.05915
P07814;Q3KQZ8;V9GYZ6;B4DKX5;H6WCP5	Bifunctional glutamate/proline--tRNA ligase;Glutamate--tRNA ligase;Proline--tRNA ligase	EPRS	170.59	66	67	0.21349	4.795	-2.22776	2.26153
K7EM56;A0A0B4J2B4;S4R417;K7EQJ5;K7ELC2;P62841;S4R456;K7EJ78	40S ribosomal protein S15	RPS15	12.99	3	2	0.21478	5.3438	-2.21907	2.41787
Q59G75;P41252;J3KR24;A0A0A0MSX9;Q7Z3U5;Q7Z355;Q6P0M4;B4DVX2;Q7L4K8	Isoleucine--tRNA ligase, cytoplasmic	IARS;DKFZp686L0869;DKFZp686L17145	146.34	36	32	0.21583	5.872	-2.21203	2.55385
B4E266;B2RCM2;Q9P2J5;B4DER1;Q9H8E3	Leucine--tRNA ligase, cytoplasmic	LARS	129.19	18	16	0.22667	6.2075	-2.14133	2.63401
A0A1B0GVU9;Q53HS0;A8K3A8;P47897;Q96AW5;B4DNN3;Q9BUZ3;B4DDN1;Q9H3A5	Glutamine--tRNA ligase	QARS	83.782	16	19	0.23262	5.9852	-2.10395	2.5814
Q15046;Q6ZTI3	Lysine--tRNA ligase	KARS	68.047	24	23	0.24505	5.2172	-2.02885	2.38328
A8K492;P56192;B4DF61;B4E0E9	Methionine--tRNA ligase, cytoplasmic	MARS	101.14	20	16	0.25341	4.4879	-1.98045	2.16604
Q9BRZ2;C9JI91	E3 ubiquitin-protein ligase TRIM56	TRIM56	81.487	15	13	0.25615	3.2326	-1.96494	1.6927
B2RAU8;A0A0A0MRM9;Q14978;Q96J17	Nucleolar and coiled-body phosphoprotein 1	NOLC1	73.603	3	6	0.28504	4.9142	-1.81076	2.29696
P23396;Q53G83;E9PL09;E9PPU1;F2Z2S8;A7E2S3;H0YEU2;H0YCJ7;Q9NQS8	40S ribosomal protein S3	RPS3	26.688	14	15	0.31649	2.6431	-1.65977	1.40223
O43324;D6RBD7;C9J1V9;D6RCQ0;H0YAL7	Eukaryotic translation elongation factor 1 epsilon-1	EEF1E1;EEF1E1-BLOC1S5	19.81	4	4	0.33814	4.7884	-1.56431	2.25954
Q9Y3C1;D6RIC3;A0A0C4DGU5;A0A087X2G6;Q9P0T8	Nucleolar protein 16	NOP16	21.188	8	8	0.34229	2.5498	-1.54671	1.35038
M0R0F0;Q53G25;A0A024R4Q8;P46782;M0R0R2	40S ribosomal protein S5;40S ribosomal protein S5, N-terminally processed	RPS5	22.391	5	5	0.3478	2.5042	-1.52367	1.32435
B2R4R9;P62857	40S ribosomal protein S28	RPS28	7.8409	2	3	0.35816	2.8576	-1.48132	1.5148
Q15717;M0QZR9	ELAV-like protein 1	ELAVL1	36.091	4	7	0.3589	2.4688	-1.47835	1.30381
B0ZBD0;Q8WVX7;P39019;A0A075B6E2	40S ribosomal protein S19	RPS19	16.06	7	12	0.37193	2.3138	-1.4269	1.21026
G3V580;G3V2L6;O14744;G3V5L5;C9JSX3;B2RDD7	Protein arginine N-methyltransferase 5;Protein arginine N-methyltransferase 5, N-terminally processed;Protein arginine N-methyltransferase 5	PRMT5	20.375	2	5	0.37294	3.6513	-1.42298	1.86841
F8W6I7;A0A024RB53;A0A024RAZ7;P09651;Q6IPF2;A0A024RC46;F8VTQ5;Q0VAC0;F8VZ49;Q9BSM5;B4E0B5	Heterogeneous nuclear ribonucleoprotein A1;Heterogeneous nuclear ribonucleoprotein A1, N-terminally processed	HNRNPA1;HNRPA1;hCG_2020860	33.155	3	11	0.37854	11.46	-1.40148	3.51854
P25398	40S ribosomal protein S12	RPS12	14.515	7	7	0.37928	3.995	-1.39866	1.9982
E9PKP7;A8K962;P17480;B4DNQ1;Q05BZ1;B4DLB0;O00164	Nucleolar transcription factor 1	UBTF	87.435	3	8	0.37984	1.1072	-1.39654	0.146916
A0A0D9SGE8;Q8IWS0;B4E138;Q5JRC6	PHD finger protein 6	PHF6	41.361	2	2	0.3811	1.4535	-1.39176	0.539531
Q59GE4;P46783;F6U211;A0A1W2PQS6;Q9NQ39	40S ribosomal protein S10;Putative 40S ribosomal protein S10-like	RPS10;RPS10P5	19.86	7	4	0.38193	2.1585	-1.38862	1.11003
J3QLE5;Q66K91;Q5XPV6;B4DVS0;X5DP00;Q15182;P63162;P14678;J3KRY3;S4R3P3;Q6LBS1;Q53HE7;Q9UIS4	Small nuclear ribonucleoprotein-associated protein;Small nuclear ribonucleoprotein-associated protein N;Small nuclear ribonucleoprotein-associated proteins B and B	SNRPN;SNRPB	17.546	3	2	0.38838	1.3607	-1.36446	0.444349
Q6P4Q7	Metal transporter CNNM4	CNNM4	86.606	3	2	0.38953	1.9446	-1.36019	0.959473
M0R210;P62249;M0R3H0;A0A087WZ27;M0R1M5;M0QX76	40S ribosomal protein S16	RPS16;ZNF90	14.419	9	6	0.3914	2.1423	-1.35328	1.09916
D6RAT0;Q6NXR8;P61247;A8K4W0;D6RG13;D6RB09;D6R9B6;H0Y9Y4;B7Z3M5;E9PFI5	40S ribosomal protein S3a	RPS3A	25.887	14	14	0.39824	1.7782	-1.32829	0.830418
Q5RKT7;B2RDW1;P62979;Q8WYN9	Ubiquitin-40S ribosomal protein S27a;Ubiquitin;40S ribosomal protein S27a	RPS27A;HEL112	17.905	4	6	0.40146	1.8173	-1.31667	0.861797
P60866;E5RJX2;E5RIP1	40S ribosomal protein S20	RPS20	13.373	3	4	0.40849	2.0955	-1.29163	1.06729
K7ERI7;Q7Z4W8;P35268;K7EP65;K7EKS7;K7ELC4;K7EMH1	60S ribosomal protein L22	RPL22	11.168	2	3	0.41113	0.92355	-1.28233	-0.114738
D6RF44;H0YA96;D6RAF8;H0Y8G5;Q12771;B4DTC3;A0A024RDF4;A0A024RDB4;A0A024RDF3;Q14103;D6RD83;D6RBQ9;B4E0W4	Heterogeneous nuclear ribonucleoprotein D0	HNRNPD;HNRPD	12.553	2	2	0.41158	5.2021	-1.28076	2.37909
Q13330;A0A024R6P5;E7ESY4;Q59FW1;H0Y4T7	Metastasis-associated protein MTA1	MTA1	80.785	2	3	0.41234	2.2955	-1.27809	1.19881
R9WQY1;A8MQB8;G3V0J0;X5D907;X5DQX7;Q06787;Q59GC1;R9WPL0;A0A087WXI3;R9WNI0;W5ZQ92;B4DZ17	Fragile X mental retardation protein 1	FMR1	63.981	6	4	0.42088	1.8503	-1.24852	0.887759
P62269	40S ribosomal protein S18	RPS18	17.718	6	8	0.42485	2.2262	-1.23497	1.15458
Q56VW8;A0A140VJT0;P63151	Serine/threonine-protein phosphatase 2A 55 kDa regulatory subunit B;Serine/threonine-protein phosphatase 2A 55 kDa regulatory subunit B alpha isoform	PPP2R2A	51.647	4	5	0.42511	3.0568	-1.23409	1.61202
K7EMV3;B4E380;B4DEB1;K7EK07;B2R6Y1;B2R4P9;K7ES00;Q71DI3;Q16695;P84243;P68431;Q6TXQ4;A8K4Y7	Histone H3;Histone H3.2;Histone H3.1t;Histone H3.3;Histone H3.1	H3F3B;H3F3A;HIST2H3A;HIST3H3;HIST1H3A	10.334	2	3	0.43116	4.332	-1.2137	2.11503
Q8N5A0;A0A087WUT6;O60841;B3KM86;D3DVI5	Eukaryotic translation initiation factor 5B	EIF5B	138.8	4	2	0.43376	0.34339	-1.20503	-1.54208
Q9H0A0;A0A087WV29;Q05CW7	N-acetyltransferase 10	NAT10	115.73	4	3	0.43782	2.0056	-1.19159	1.00403
B4E3E6;B4DDB6;P51991;Q65ZQ3	Heterogeneous nuclear ribonucleoprotein A3	HNRPA3;HNRNPA3;D10S102	34.189	3	3	0.43818	3.3889	-1.1904	1.76082
I3L3P7;B2R4W8;P62244;A8K7H3;I3L246	40S ribosomal protein S15a	RPS15A;hCG_1994130	11.477	4	4	0.43912	1.3814	-1.18731	0.466131
Q6FI03;Q5U0Q1;Q53HH4;Q32P45;Q13283	Ras GTPase-activating protein-binding protein 1	G3BP;DKFZp686L1159;G3BP1	52.164	4	3	0.43987	2.0022	-1.18485	1.00159
B7Z5H0;F8W020;F8VY35;F8W0J6;F5H4R6;B7Z2V4;H0YIV4;A0A024RBB7;P55209;F8VRJ2;F8VVB5;H0YHC3;F8W118;F8VXI6;F8VUX1;F8VV59;B7Z9C2;A0A024RBE6;H0YH88	Nucleosome assembly protein 1-like 1	NAP1L1	17.961	2	4	0.44397	1.7631	-1.17147	0.818114
A0A024R6D4;P84090;G3V279	Enhancer of rudimentary homolog	ERH	12.259	5	4	0.44422	2.2877	-1.17065	1.1939
H0YN73;H0YN88;A0A075B716;P08708	40S ribosomal protein S17	RPS17	6.7559	2	3	0.44508	3.0277	-1.16786	1.59822
Q5T7U1;Q9Y5Q8	General transcription factor 3C polypeptide 5	GTF3C5	52.29	6	7	0.44637	1.8786	-1.16369	0.909658
P51116	Fragile X mental retardation syndrome-related protein 2	FXR2	74.222	10	12	0.44742	2.1801	-1.1603	1.12439
B2R4C1;P62899;H7C2W9;C9JU56;B7Z4E3;B7Z4C8;B8ZZK4	60S ribosomal protein L31	RPL31	14.495	4	4	0.44839	2.3559	-1.15717	1.23628
A8K6V7;A0A024RDB2;A0A024RDE5;Q9UN86	Ras GTPase-activating protein-binding protein 2	G3BP2	50.816	3	2	0.44839	2.2092	-1.15717	1.14352
P62263;H0YB22;E5RH77	40S ribosomal protein S14	RPS14	16.273	6	7	0.45069	1.5353	-1.14979	0.618521
P62318;H3BT13	Small nuclear ribonucleoprotein Sm D3	SNRPD3	13.916	3	4	0.45084	3.3092	-1.14931	1.72648
B5BUB5;P05455;Q9UMH5;Q14730	Lupus La protein	SSB	46.867	3	3	0.45351	1.9406	-1.14079	0.956503
B2R7W0;P13995;B8ZZU9;B4DY35;B9A062	Bifunctional methylenetetrahydrofolate dehydrogenase/cyclohydrolase, mitochondrial;NAD-dependent methylenetetrahydrofolate dehydrogenase;Methenyltetrahydrofolate cyclohydrolase	MTHFD2	37.32	2	4	0.45558	2.0467	-1.13422	1.0333
B7Z8C9;G3V3G9;B7Z2P6;Q5TAQ9;V9GY54	DDB1- and CUL4-associated factor 8	DCAF8	64.867	7	4	0.4561	1.7795	-1.13258	0.831472
P78345;Q5VUC3	Ribonuclease P protein subunit p38	RPP38	31.834	2	5	0.45831	1.9358	-1.1256	0.95293
Q32NC0;L7N2F3;A0A087X0E7;W4VSQ2;Q8TBS0	UPF0711 protein C18orf21	C18orf21	24.826	3	3	0.46207	1.9493	-1.11382	0.962956
J3QQY0;J3KSZ8;Q68DK7	Male-specific lethal 1 homolog	MSL1	48.976	2	2	0.46564	2.1834	-1.10271	1.12658
Q7Z417	Nuclear fragile X mental retardation-interacting protein 2	NUFIP2	76.12	9	8	0.46725	2.0386	-1.09773	1.02758
Q9NX58;A8K3Y5	Cell growth-regulating nucleolar protein	LYAR	43.614	5	7	0.47047	1.1911	-1.08783	0.252295
Q8WUA4;Q53QN0;A0A087WZD8	General transcription factor 3C polypeptide 2	GTF3C2	100.68	4	3	0.4713	1.5784	-1.08528	0.658463
Q8N1H4;Q68DZ9;Q59GA1;B2RDQ3;P62995	Transformer-2 protein homolog beta	DKFZp686F18120;TRA2B	29.201	1	3	0.47133	2.2735	-1.08519	1.18492
E7ETK0;A0A087WUS0;P62847	40S ribosomal protein S24	RPS24	15.197	6	6	0.47211	1.4493	-1.08281	0.535356
D3DQ70;Q8NC51;Q63HR1;Q5VU21;D3DQ69	Plasminogen activator inhibitor 1 RNA-binding protein	SERBP1;DKFZp686P17171	50.92	6	7	0.47608	2.1474	-1.07072	1.10259
Q969Q0;B2R4V2	60S ribosomal protein L36a-like	RPL36AL	12.469	10	8	0.48433	1.1083	-1.04594	0.148348
A0A024R4M0;P46781;A5D904;B5MCT8;C9JM19;B7Z732	40S ribosomal protein S9	RPS9	22.591	11	11	0.48959	1.5122	-1.03035	0.596649
Q9UN78;Q8TE29;O00377;O00376;O00369;O00367;O00361;G8I2S8;Q9UN81;O00373;Q12880;O00374;Q15401;O00365;O00364;O00371	LINE-1 retrotransposable element ORF1 protein	L1RE1	40.059	7	3	0.49044	1.7455	-1.02785	0.80364
A0A024R534;O94776	Metastasis-associated protein MTA2	MTA2	75.022	6	4	0.49074	2.0871	-1.02697	1.0615
O95983;B3KMA8;K7EIE8	Methyl-CpG-binding domain protein 3	MBD3	32.844	2	3	0.49483	2.122	-1.015	1.08542
B3KUR4;A4D299;J3KR72;P49848	Transcription initiation factor TFIID subunit 6	TAF6	64.217	1	3	0.49504	2.9594	-1.01438	1.5653
A0A0U1RRM1;B3KSZ4;Q8WXI9;A0A0U1RR30	Transcriptional repressor p66-beta	GATAD2B	63.461	3	3	0.49566	3.3006	-1.01258	1.72273
Q9H2U1;E7EWK3;B7Z8P5	ATP-dependent RNA helicase DHX36	DHX36	114.76	6	5	0.49595	1.9405	-1.01173	0.956428
H7BXY3;A0A024R2T6;Q7L2E3	Putative ATP-dependent RNA helicase DHX30	DHX30	130.55	5	3	0.49612	1.5648	-1.01124	0.645978
H0Y5B4;H7BZ11;J3KQN4;P83881;H7BY91;H0Y3V9	60S ribosomal protein L36a	RPL36A;RPL36A-HNRNPH2	13.228	2	3	0.49654	1.0554	-1.01002	0.0777899
H3BQZ7;Q1KMD3	Heterogeneous nuclear ribonucleoprotein U-like protein 2	HNRNPUL2-BSCL2;HNRNPUL2	84.69	4	4	0.50743	1.0825	-0.978719	0.114367
Q6FHQ0;Q16576;E9PC52;A8K6A2;Q5JP01	Histone-binding protein RBBP7	RBBP7	47.82	8	9	0.51117	1.7765	-0.968125	0.829038
Q13428;J3KQ96;E7ETY2	Treacle protein	TCOF1	152.1	6	5	0.51275	0.84926	-0.963673	-0.235722
Q09028;H0YF10	Histone-binding protein RBBP4	RBBP4	47.655	4	3	0.51344	1.5569	-0.961732	0.638676
Q96IR1;B2R491;P62701;Q53HV1	40S ribosomal protein S4;40S ribosomal protein S4, X isoform	RPS4X	27.259	13	12	0.51846	1.5451	-0.947695	0.6277
B2R4R0;P62805;Q0VAS5	Histone H4	HIST1H4H;HIST1H4A	11.367	8	8	0.5188	2.1067	-0.94675	1.07498
A0A024RD99;B7Z2D8;B7Z5F9;B3KP14;H0Y8R1;F5H5I6;B7Z3R7;H0YAK1;B3KW50;Q12849;H0YAM1	G-rich sequence factor 1	GRSF1	36.613	3	3	0.52021	2.0509	-0.942834	1.03626
Q9UKN8;Q05CN7	General transcription factor 3C polypeptide 4	GTF3C4	91.981	6	4	0.52407	1.4073	-0.932169	0.49293
B4DSF8;G3V153;B3KXU8;Q14444;E9PLA9	Caprin-1	CAPRIN1	40.501	2	3	0.52509	2.7887	-0.929363	1.47959
Q08211;B3KU66	ATP-dependent RNA helicase A	DHX9	140.96	4	8	0.52518	3.0526	-0.929116	1.61004
Q14694	Ubiquitin carboxyl-terminal hydrolase 10	USP10	87.133	7	9	0.52539	1.7293	-0.928539	0.790188
C9JA69;A8K6U2;Q8WY36;Q9H6G9;Q6ZNU6;Q9H6A7;D3DN56	HMG box transcription factor BBX	BBX	99.328	2	2	0.52653	1.0906	-0.925412	0.125122
B4E2I9;Q99985	Semaphorin-3C	SEMA3C	87.168	2	2	0.52895	1.1684	-0.918797	0.224534
A8K964;Q9H307	Pinin	PNN	81.541	10	6	0.53912	2.1289	-0.891322	1.09011
Q4ZG32;Q9HCM4	Band 4.1-like protein 5	EPB41L5	60.645	7	6	0.53969	1.5787	-0.889797	0.658737
A0A0S2Z4G7;A0A0S2Z491;P06748;A0A140VJQ2;A4ZU86;Q9BTI9	Nucleophosmin	NPM1	29.464	11	11	0.54042	1.7299	-0.887847	0.790689
U3KQC1;Q9BV38;A0A0A0MQU0;K7EIR0	WD repeat-containing protein 18	WDR18	43.237	6	4	0.5433	1.939	-0.880179	0.955313
E9PR30;P62861	40S ribosomal protein S30	FAU	10.905	2	2	0.54338	1.0543	-0.879967	0.0762854
B2RNR6;Q96KR1;A8K849	Zinc finger RNA-binding protein	ZFR	117.01	6	6	0.544	2.2405	-0.878321	1.16382
O75607	Nucleoplasmin-3	NPM3	19.343	4	3	0.54806	2.503	-0.867594	1.32366
Q9UMS4	Pre-mRNA-processing factor 19	PRPF19	55.18	3	2	0.55217	1.3754	-0.856816	0.459851
Q12873;B4DLC6	Chromodomain-helicase-DNA-binding protein 3	CHD3	226.59	12	14	0.5524	1.5003	-0.856215	0.585251
A0A0A0MTD1;Q2TBD5;F8VPI7;Q4LE57;E7EPX0;E7EVJ4;E9PH62;A0A0A0MTC5;A0A024R7X7;Q9NUL3;A0A0A0MTC4;A0A0A0MTC6;G5EA18;E5RJN7;A8K276;E7EVI1;B7Z1P6	Double-stranded RNA-binding protein Staufen homolog 2	STAU2;STAU2 variant protein	52.009	12	9	0.55268	1.4662	-0.855484	0.552082
B4DSH1;B3KY60;Q99459	Cell division cycle 5-like protein	CDC5L	89.225	4	3	0.55761	2.0916	-0.842672	1.06461
F5GWX5;A0A0C4DGG9;Q14839;B3KY63	Chromodomain-helicase-DNA-binding protein 4	CHD4	217.1	3	4	0.55823	1.8561	-0.841068	0.892274
B4E0S6;O43143	Pre-mRNA-splicing factor ATP-dependent RNA helicase DHX15	DHX15	89.546	3	6	0.55966	1.1402	-0.837377	0.189287
Q9HD34;C9JY28;C9JRX8;F5H189	LYR motif-containing protein 4	LYRM4	10.758	5	5	0.56174	3.8642	-0.832026	1.95017
O75691	Small subunit processome component 20 homolog	UTP20	318.38	3	2	0.56336	0.52392	-0.827871	-0.932582
O43150;Q53RT9	Arf-GAP with SH3 domain, ANK repeat and PH domain-containing protein 2	ASAP2;DDEF2	111.65	6	5	0.56786	1.7558	-0.816393	0.812129
E9PMI6;J3KN38;P54105;E9PJF4	Methylosome subunit pICln	CLNS1A	18.259	4	3	0.56849	4.4549	-0.814793	2.15539
A0A024R7K7;A0A024R7M6;Q86YP4;B4E0Q6	Transcriptional repressor p66-alpha	GATAD2A	68.062	4	5	0.56919	1.5959	-0.813018	0.67437
A0A0A0MRV0;A7BI36;Q9P2E9;A1A5C4;A0A087WVV2;F8W7S5;A1A5C5	Ribosome-binding protein 1	RRBP1	152.45	34	29	0.56958	1.51	-0.81203	0.594549
Q9NZB2	Constitutive coactivator of PPAR-gamma-like protein 1	FAM120A	121.89	19	11	0.57439	1.7175	-0.799897	0.78031
A0A024R7L5;A0A024R7L8;Q92900;B3KY55	Regulator of nonsense transcripts 1	UPF1	123.03	14	8	0.57657	1.4905	-0.794432	0.575796
O14646	Chromodomain-helicase-DNA-binding protein 1	CHD1	196.69	6	4	0.57813	1.2769	-0.790534	0.352646
O75569;G5E9Q4;F8WEG8;C9JMM3	Interferon-inducible double-stranded RNA-dependent protein kinase activator A	PRKRA	34.404	8	6	0.58181	1.3388	-0.78138	0.42094
Q3MIH3;P62987;J3QSA3;F5GZ39;M0R1V7;J3QS39;Q49A90;J3QTR3;F5H6Q2;F5GYU3;F5H2Z3;M0R2S1;F5H265;Q5UGI3;B4DV12;F5H388;F5H747;F5GXK7;J3QKN0;Q5U5U6;Q5PY61;Q9UFQ0;Q96C32;Q96MH4;L8B4I8;L8B196;Q96H31;L8B4R0;A8K674;L8B4Z6;L8B4M0;L8B4J3;Q66K58;Q59EM9;P0CG47;P0CG48	Ubiquitin-60S ribosomal protein L40;Ubiquitin;60S ribosomal protein L40;Polyubiquitin-B;Ubiquitin;Polyubiquitin-C;Ubiquitin	UBA52;UBB;UBC;RPS27A;DKFZp434K0435;UbC	14.728	1	1	0.58403	1.414	-0.775886	0.499782
Q5C9Z4	Nucleolar MIF4G domain-containing protein 1	NOM1	96.256	9	9	0.58563	1.5837	-0.771939	0.663299
X6RAL5;H7BZW6;O00422	Histone deacetylase complex subunit SAP18	SAP18	19.526	3	3	0.5862	1.344	-0.770535	0.426533
Q96HS1	Serine/threonine-protein phosphatase PGAM5, mitochondrial	PGAM5	32.004	2	4	0.5868	2.4621	-0.769059	1.29989
O95625;Q59H97	Zinc finger and BTB domain-containing protein 11	ZBTB11	119.38	11	9	0.58754	1.5953	-0.767241	0.673828
A0A0F7KYT8;A0A0F7L1S3;P51114;A0A0F7L0Q8;B4DXZ6;E9PFF5;B4DM21;B4DM78	Fragile X mental retardation syndrome-related protein 1	FXR1	76.199	7	7	0.58818	1.6659	-0.76567	0.736302
A0A0U1RRM4;P26599;A0A0D9SF20;A6NLN1;K7EKJ7	Polypyrimidine tract-binding protein 1	PTBP1	62.463	3	4	0.589	2.2154	-0.76366	1.14757
P62277;J3KMX5	40S ribosomal protein S13	RPS13	17.222	11	11	0.58918	1.4536	-0.76322	0.53963
A0A0S2Z4Q3;A0A0S2Z4K2;P62633	Cellular nucleic acid-binding protein	CNBP	18.742	6	5	0.59208	1.3005	-0.756136	0.379066
Q53T99;Q9GZL7;B4DRY7	Ribosome biogenesis protein WDR12	WDR12	47.707	4	1	0.59272	1.1478	-0.754577	0.198871
A0A0B4J220;L0R588;E9PLD3;E9PRG8	Uncharacterized protein C11orf98	C11orf98;C11orf48	14.234	5	4	0.59308	1.2995	-0.753701	0.377957
Q96DI9;F6VRR5;B4E0L0;Q9BY77;Q8WUT1;F8WCX5;Q659C6	Polymerase delta-interacting protein 3	POLDIP3;DKFZp434G0310	45.658	2	5	0.59335	1.7125	-0.753045	0.776104
Q6AHZ7;Q12789;Q6AWA4	General transcription factor 3C polypeptide 1	DKFZp686A111;GTF3C1;DKFZp686O0870	238.8	13	15	0.59552	1.9924	-0.747778	0.994507
C9J6P4;Q7Z2W4;A8K9U6	Zinc finger CCCH-type antiviral protein 1	ZC3HAV1	114.08	10	9	0.59702	1.5422	-0.744149	0.62499
A0A024RB14;P62854;Q75MH1;Q5JNZ5	40S ribosomal protein S26;Putative 40S ribosomal protein S26-like 1	RPS26;RPS26P11	13.015	3	3	0.59781	1.5648	-0.742241	0.645978
Q5T3I0;A0A0A0MRK1;E9PAV9;A8KAG1	G patch domain-containing protein 4	GPATCH4	50.381	3	3	0.59845	1.5733	-0.740697	0.653794
Q6NUN2;A3F769;O15226;A3F768;A2I829	NF-kappa-B-repressing factor	NKRF;NRF	77.703	18	17	0.59904	1.5779	-0.739276	0.658006
B2RDN4;A8K3R2;Q14137;Q6DKJ9;Q4G0D9;B4DEN9	Ribosome biogenesis protein BOP1	BOP1	83.586	6	2	0.60083	1.4763	-0.734971	0.561986
B4DE69;B4DDF7;A8K7B7;A8K3H8;P30153;B4DQY1;C9J9C1;B3KQV6;Q8NB89	Serine/threonine-protein phosphatase 2A 65 kDa regulatory subunit A alpha isoform	PPP2R1A	59.143	6	3	0.6044	3.5555	-0.726424	1.83005
Q9H147;H7C1J2	Deoxynucleotidyltransferase terminal-interacting protein 1	DNTTIP1	37.013	3	2	0.60534	1.7485	-0.724182	0.806118
A0A087WYR0;P09132;A0A087WWU9	Signal recognition particle 19 kDa protein	SRP19	13.654	2	4	0.60539	1.4923	-0.724063	0.577538
B4DY59;E9PF19;B4DY50;Q96E41;A0A0S2Z5F3;Q8N2L6;B2RB52;Q9Y4P3	Transducin beta-like protein 2	TBL2	35.379	3	2	0.60601	1.3359	-0.722586	0.417812
J3KTA4;P17844;B4DN41;B5BUE6;B4DNG2;Q7Z2V5;Q59E92	Probable ATP-dependent RNA helicase DDX5	DDX5;DKFZp686J01190	69.086	18	16	0.60632	1.7146	-0.721849	0.777872
Q59H57;B4DR70;A8K4H1;Q8TBR3;Q6IBQ5;H3BPE7;Q13344;P35637;Q70T18	RNA-binding protein FUS	FUS	31.994	9	7	0.60648	1.489	-0.721468	0.574344
F2FB34;O94964;B3KYA9;H0YDM2	Protein SOGA1;N-terminal form;C-terminal 80 kDa form	SOGA1	151.25	2	3	0.60746	1.1311	-0.719139	0.177726
Q8WWM7;A0A024QZB7;A0A024QZC0;A0A024QZ91;H3BUF6	Ataxin-2-like protein	ATXN2L	113.37	10	10	0.60867	1.4547	-0.716268	0.540722
A0A024RCA7;P05387	60S acidic ribosomal protein P2	RPLP2	11.665	12	10	0.60979	6.8234	-0.713616	2.77049
B7Z4V2;V9HW84;P38646;Q8N1C8;B7Z1V7;B7Z4T3	Stress-70 protein, mitochondrial	HEL-S-124m;HSPA9	72.4	30	26	0.61301	2.4412	-0.706017	1.28759
B2R713;Q7Z2T5;B4DXX1	TRMT1-like protein	TRMT1L	81.775	6	6	0.61494	1.5876	-0.701482	0.666847
P62280;M0QZC5	40S ribosomal protein S11	RPS11	18.431	8	5	0.61632	1.2721	-0.698248	0.347212
Q59GN2;P62891	Putative 60S ribosomal protein L39-like 5;60S ribosomal protein L39	RPL39P5;RPL39	6.3225	2	2	0.61693	1.0372	-0.696821	0.0526941
Q6FHM6;B1AHD1;P55769	NHP2-like protein 1;NHP2-like protein 1, N-terminally processed	NHP2L1	14.173	2	2	0.6172	2.4716	-0.69619	1.30545
A0A1W2PQ51;Q59F66;Q92841;B4DZQ7	Probable ATP-dependent RNA helicase DDX17	DDX17	80.457	11	11	0.61964	1.6059	-0.690498	0.683382
Q92522	Histone H1x	H1FX	22.487	8	8	0.62077	1.1864	-0.687869	0.246591
A0A0A6YYI3;A0A0B4J1V8;Q9NQ55;A8MV53;H7C446	Suppressor of SWI4 1 homolog	PPAN-P2RY11;PPAN	58.199	6	5	0.62394	1.1241	-0.680521	0.16877
Q9BWF3;E9PB51;A8K9U0	RNA-binding protein 4	RBM4	40.313	4	3	0.62837	1.2491	-0.670314	0.320889
Q53Z07;P32969;E7ESE0;D6RAN4;B4E1M5;B4DLV8;H0Y9V9	60S ribosomal protein L9	RPL9	21.863	6	6	0.62972	0.94357	-0.667218	-0.0837985
A0A0C4DGT8;A0A087WWP8;Q5VWQ0;A0A0C4DH79	Round spermatid basic protein 1	RSBN1	77.319	3	5	0.6309	1.6775	-0.664517	0.746313
Q92804;A0A075B7D9;B4E312	TATA-binding protein-associated factor 2N	TAF15	61.829	2	3	0.63187	1.5193	-0.6623	0.603407
E5RHG8;A0A024R7Y5;Q15369;R4GMY8	Transcription elongation factor B polypeptide 1	TCEB1	9.9601	7	8	0.63376	2.2243	-0.657991	1.15335
Q9NPD3;E9PPI9	Exosome complex component RRP41	EXOSC4	26.383	2	3	0.63774	1.4522	-0.64896	0.53824
P46013	Antigen KI-67	MKI67	358.69	12	12	0.63802	1.6553	-0.648326	0.727093
B4DYA2;Q15020;B4DRG9;F8VV04	Squamous cell carcinoma antigen recognized by T-cells 3	SART3	59.47	4	5	0.64023	1.4784	-0.643338	0.564037
Q96DH6;J3QKT5;B4DHE8;J3KTC1	RNA-binding protein Musashi homolog 2	MSI2	35.196	3	3	0.64174	1.2577	-0.639939	0.330788
B4DJ73;B4DVN9;B4DHL5;B4E228;Q6NW34;B4DUV5;B4E1X5	Uncharacterized protein C3orf17	C3orf17	46.101	6	5	0.6424	1.8655	-0.638456	0.899562
Q7Z7K2	Zinc finger protein 467	ZNF467	65.124	7	6	0.6446	1.2762	-0.633524	0.351854
B4DVI7;Q9UHB9;Q96K97	Signal recognition particle subunit SRP68	SRP68	60.226	1	3	0.64535	1.2027	-0.631846	0.266277
Q5JW30;A8K622;Q59F99;O95793;A0A087X1A5;B3KRE0	Double-stranded RNA-binding protein Staufen homolog 1	STAU1	54.708	13	12	0.64572	1.5085	-0.631019	0.593115
B2RDP4;A8K1I4;A0A024QZD9;Q96K58	Zinc finger protein 668	ZNF668	67.932	4	4	0.64588	1.3992	-0.630662	0.484602
O75533;A0JLT9;Q32Q20;A0PJH5;Q7Z497	Splicing factor 3B subunit 1	SF3B1	145.83	7	8	0.64674	1.6065	-0.628742	0.683921
Q6IBA2;Q59G24;P53999;B7Z1Z0;Q6E433	Activated RNA polymerase II transcriptional coactivator p15	PC4;SUB1	14.395	3	3	0.64689	1.1589	-0.628408	0.212756
O00268;A0A0G2JRY5	Transcription initiation factor TFIID subunit 4	TAF4	110.11	3	5	0.6505	1.5568	-0.620379	0.638584
A8K3W4;A0A024R0J9;A0A0A0MRA5;B7Z4B8;A8K6U7;Q9BUJ2;A8K5K0;M0R3F1	Heterogeneous nuclear ribonucleoprotein U-like protein 1	HNRPUL1;HNRNPUL1	84.821	14	12	0.65081	1.3	-0.619692	0.378512
Q9BTQ7;A0A024R1Q8;P62829;J3KT29;C9JD32;J3KTJ3;B9ZVP7	60S ribosomal protein L23	RPL23	14.149	11	10	0.65083	1.1154	-0.619647	0.157561
Q9Y221;B3KM49;J3QLW7	60S ribosome subunit biogenesis protein NIP7 homolog	NIP7	20.462	5	4	0.65208	1.2166	-0.616879	0.282855
Q9BV37;Q53FW9;A0A024RBH5;Q13610;B4DNL1;B4DJV5	Periodic tryptophan protein 1 homolog	PWP1	55.878	5	2	0.65226	1.6763	-0.616481	0.74528
Q3KQT6;P15880;H0YEN5;Q8J014;Q8N5L9;Q6IPX5;E9PQD7;I3L404;E9PM36;Q9BSW5;E9PMM9	40S ribosomal protein S2	RPS2;rps2	31.384	10	10	0.65245	1.4259	-0.616061	0.511873
A0A0B4J1Z1;B4DEK2;C9JAB2;Q16629;Q8NB80	Serine/arginine-rich splicing factor 7	SRSF7	15.763	5	4	0.65307	2.0282	-0.61469	1.0202
A0A024R9C1;P11940;A0A087WTT1;E7EQV3;E7ERJ7;B4DQX0;B4DZW4;A0A024R9E2;H0YAR2;Q5VX58;Q3ZCS4;Q9H361;Q2VIP3	Polyadenylate-binding protein;Polyadenylate-binding protein 1;Polyadenylate-binding protein 3	PABPC1;PABPC3	70.67	22	22	0.65464	1.3727	-0.611226	0.457016
Q8N4P8;D2CFK9;Q9BZE4;B4DHR2;Q53GS0;O60747	Nucleolar GTP-binding protein 1	GTPBP4	73.708	7	7	0.65532	1.2034	-0.609729	0.267116
P62750;H7BY10;K7ERT8;A8MUS3;K7EJV9;K7EMA7	60S ribosomal protein L23a	RPL23A	17.695	11	7	0.6583	1.1647	-0.603183	0.219958
Q8TD26	Chromodomain-helicase-DNA-binding protein 6	CHD6	305.41	11	15	0.65989	1.3722	-0.599703	0.456491
A0A024RAQ1;P16989;Q59EB5	Y-box-binding protein 3	CSDA;YBX3	40.089	6	4	0.66011	1.2156	-0.599222	0.281669
B4DRH6;E9KL44;P40939;B4DDZ5;H0YFD6	Trifunctional enzyme subunit alpha, mitochondrial;Long-chain enoyl-CoA hydratase;Long chain 3-hydroxyacyl-CoA dehydrogenase	HADHA	78.314	2	4	0.66126	1.1918	-0.59671	0.253142
Q13263;B2R8R5;M0R0K9	Transcription intermediary factor 1-beta	TRIM28	88.549	6	8	0.66359	0.90802	-0.591636	-0.139204
A0A090N8Z2;A8K9F5;A0A090N8H1;Q9BWE0;C9JZE3;C9JYJ8;E7EVL6	Replication initiator 1	REPIN1	62.291	3	2	0.66736	1.2647	-0.583463	0.338795
O14925;B1APJ0;Q5SRD1	Mitochondrial import inner membrane translocase subunit Tim23;Putative mitochondrial import inner membrane translocase subunit Tim23B	TIMM23;TIMM23B	21.943	2	2	0.66761	0.91158	-0.582923	-0.133559
O14929	Histone acetyltransferase type B catalytic subunit	HAT1	49.512	2	3	0.66791	2.2016	-0.582274	1.13855
Q2L6I2;A0A1U9X609;Q8NE71;Q59F96;H0YGW7;B4DNU2	ATP-binding cassette sub-family F member 1	ABCF1	91.679	9	8	0.66925	1.0259	-0.579383	0.0368901
Q7Z726;A8K7D9;P52292;J3QLL0;J3KS65	Importin subunit alpha;Importin subunit alpha-1	KPNA2	57.875	2	4	0.67077	2.1521	-0.57611	1.10575
Q9BVP2;A0A024R2Z6	Guanine nucleotide-binding protein-like 3	GNL3	61.992	9	12	0.67166	1.399	-0.574197	0.484396
Q5T8I3	Protein FAM102B	FAM102B	39.308	3	6	0.67215	1.2065	-0.573145	0.270828
Q05CK9;B7Z645;Q59GL1;B2R8Z8;O60506;F6UXX1	Heterogeneous nuclear ribonucleoprotein Q	SYNCRIP	50.65	1	2	0.67243	1.5363	-0.572544	0.61946
G3V529;Q9GZR7;B4DM03;F5GYL3;B4E300;Q59FS7;B4DKV2;A0A1W2PRR2;A0A087WXU8;Q7Z4X3	ATP-dependent RNA helicase DDX24	DDX24	91.48	15	15	0.6726	1.2745	-0.572179	0.349931
A0A024R753;Q9NW13	RNA-binding protein 28	RBM28	85.737	21	22	0.67419	1.1432	-0.568773	0.193078
Q9NVV4	Poly(A) RNA polymerase, mitochondrial	MTPAP	66.171	3	3	0.67501	2.0109	-0.567019	1.00784
A0A1W2PQ69;P0CJ79;A8K8T4;Q5VIY5;P17035	Zinc finger protein 888;Zinc finger protein 468;Zinc finger protein 28	ZNF888;ZNF468;ZNF28	83.548	4	4	0.67755	1.6183	-0.561601	0.694479
Q53T09;P13010	X-ray repair cross-complementing protein 5	XRCC5	64.243	5	7	0.67842	1.1966	-0.559749	0.258941
X6RGJ2;Q5SSJ5;B0QZK4;Q5SWC8	Heterochromatin protein 1-binding protein 3	HP1BP3	36.514	5	7	0.68147	1.1657	-0.553278	0.221197
A0A024R7T4;P17026	Zinc finger protein 22	ZNF22	25.915	4	3	0.68171	2.9009	-0.55277	1.5365
P16403	Histone H1.2	HIST1H1C	21.364	3	2	0.68235	1.3506	-0.551416	0.4336
A0A0D9SFB3;A0A0D9SG12;B5BTY4;A0A0D9SF53;O00571;Q59GX6;B4DLU5;Q5S4N1;A0A024R9A4;O15523	ATP-dependent RNA helicase DDX3X;ATP-dependent RNA helicase DDX3Y	DDX3X;DDX3Y	70.839	11	9	0.68267	2.1576	-0.55074	1.10943
Q5QP19;Q53FP3;B2R5S3;Q9Y697;F2Z2E7;B4DNL7	Cysteine desulfurase, mitochondrial	NFS1	44.017	22	22	0.68322	2.2303	-0.549578	1.15724
A8K517;P62266;D6RD47	40S ribosomal protein S23	RPS23	15.807	7	7	0.68337	1.1292	-0.549261	0.175301
P56537	Eukaryotic translation initiation factor 6	EIF6	26.599	6	6	0.68578	1.6252	-0.544182	0.700617
A8K9K6;O00567;A0PJ92;Q9BSN3;H0Y653;H0YDU4	Nucleolar protein 56	NOP56	65.977	2	4	0.68655	1.1171	-0.542563	0.159758
Q9H116	GDNF-inducible zinc finger protein 1	GZF1	80.491	7	5	0.68688	1.0992	-0.54187	0.136454
Q8NB90	Spermatogenesis-associated protein 5	SPATA5	97.903	9	8	0.68708	1.3832	-0.54145	0.46801
Q9UBB5;O60535	Methyl-CpG-binding domain protein 2	MBD2;NY-CO-41	43.254	3	2	0.68795	2.0899	-0.539624	1.06343
Q9BVQ7	Spermatogenesis-associated protein 5-like protein 1	SPATA5L1	80.709	8	7	0.68992	1.3363	-0.535499	0.418244
Q8NB50	Zinc finger protein 62 homolog	ZFP62	102.51	6	6	0.69534	0.96972	-0.52421	-0.0443599
Q8TDN6;A0JLQ5;B4E0B8;Q9NUW4	Ribosome biogenesis protein BRX1 homolog	BRIX1;BXDC2	41.401	8	8	0.69635	1.0702	-0.522115	0.0978804
B7ZLC9;Q8TEQ6	Gem-associated protein 5	GEMIN5	168.43	2	3	0.69759	1.2179	-0.519549	0.284396
Q59EC0;B7Z8Y3			137.83	23	13	0.69867	1.593	-0.517317	0.671746
Q99575;Q96F88	Ribonucleases P/MRP protein subunit POP1	POP1	114.71	17	16	0.69871	1.3117	-0.517234	0.391438
D3YTB1;A0A024R2G7;F8W727;P62910	60S ribosomal protein L32	RPL32	15.616	11	6	0.69941	1.0255	-0.51579	0.0363275
Q86UY0;Q6EHZ3;Q658S9;Q8NBS9;A0A024QZV0	Thioredoxin domain-containing protein 5	TXNDC5;STRF8;DKFZp666I134;hCG_1811539	40.369	11	10	0.70025	1.684	-0.514058	0.751892
P46087	Probable 28S rRNA (cytosine(4447)-C(5))-methyltransferase	NOP2	89.301	24	24	0.70193	1.148	-0.510601	0.199123
Q9NXV6;B3KTW3	CDKN2A-interacting protein	CDKN2AIP	61.124	6	4	0.70436	1.2829	-0.505615	0.359409
B0S7P4;Q9Y676;B4DFG6;A0A0G2JIC6;A0A1U9X819	28S ribosomal protein S18b, mitochondrial	MRPS18B	29.395	4	3	0.70439	1.1392	-0.505554	0.188021
Q8IY81;B4DKU3	pre-rRNA processing protein FTSJ3	FTSJ3	96.557	24	22	0.70905	1.2136	-0.496041	0.279293
A0A0S2Z4Z0;Q96PK6;Q59GV2	RNA-binding protein 14	RBM14	69.491	6	7	0.71436	1.715	-0.485277	0.778209
B3KQ51;Q8WZ56;Q6I9T8;Q5U0I7;B3KUN1;B3KRM2;A0A140VJS0;P67775;P62714;H0YC23	Serine/threonine-protein phosphatase;Serine/threonine-protein phosphatase 2A catalytic subunit alpha isoform;Serine/threonine-protein phosphatase 2A catalytic subunit beta isoform	PPP2CA;PPP2CB	28.089	3	3	0.71467	1.3512	-0.484651	0.434241
B2R5M9;A0A024R4H0;Q02809;B4DGN8;Q5JXB7	Procollagen-lysine,2-oxoglutarate 5-dioxygenase 1	PLOD1	83.503	7	7	0.71521	1.5515	-0.483561	0.633664
Q8TDD1	ATP-dependent RNA helicase DDX54	DDX54	98.594	13	11	0.71572	1.1932	-0.482533	0.254836
Q5VVD0;P62913;Q5VVC9;Q5VVC8	60S ribosomal protein L11	RPL11	20.252	9	8	0.71598	1.0676	-0.482009	0.0943712
A0A024RA28;P22626	Heterogeneous nuclear ribonucleoproteins A2/B1	HNRPA2B1;HNRNPA2B1	31.162	4	8	0.71761	1.8156	-0.478728	0.860446
Q9Y3T1;E9PJF5;H0YCF7;G5E9I4;Q9HCU9;E9PPD1	Breast cancer metastasis-suppressor 1	DKFZp564A063;BRMS1	28.193	2	2	0.71855	1.1483	-0.47684	0.1995
Q8IWU5	Extracellular sulfatase Sulf-2	SULF2	100.45	4	4	0.72087	1.2698	-0.472189	0.344601
Q9Y4W2;B3KNR6	Ribosomal biogenesis protein LAS1L	LAS1L	83.064	3	2	0.72119	1.4968	-0.471549	0.581881
Q6PKG0;A0A0B4J210;E5RH50	La-related protein 1	LARP1	123.51	22	18	0.72211	1.4217	-0.469709	0.507617
A0A024R1N1;A0A0U4BW16;P35579;Q6ZNL4	Myosin-9	MYH9;FLJ00279	226.53	2	13	0.72329	2.371	-0.467354	1.2455
V9HWB4;P11021	78 kDa glucose-regulated protein	HEL-S-89n;HSPA5	72.332	19	18	0.72392	1.4823	-0.466098	0.567837
B4DDC8;B3KXL8;Q6IAU5;B2R665;O15355	Protein phosphatase 1G	PPM1G	56.134	3	5	0.72525	1.2457	-0.46345	0.316957
Q9HD72;A8K6Y8;A0A024R1H7;A0A024R1F8;A0A024R1M5;Q9HBE1;Q59HH1	POZ-, AT hook-, and zinc finger-containing protein 1	ZNF278;PATZ1	45.257	2	5	0.72725	1.6693	-0.459477	0.739243
A0A024RAH8;Q9NVP1;Q4ZG72	ATP-dependent RNA helicase DDX18	DDX18	75.406	2	5	0.7287	1.5782	-0.456603	0.65828
E5KRK5;P28331;B4DJ81;Q9P1A0	NADH-ubiquinone oxidoreductase 75 kDa subunit, mitochondrial	NDUFS1	79.467	5	5	0.72892	1.7226	-0.456168	0.784588
B3KMR5;Q5JTH9;B3KY97	RRP12-like protein	RRP12	143.67	11	8	0.73123	1.362	-0.451603	0.445727
Q8NCK5;Q9BQ67;Q8TCJ8;B2RDP6;M0QX71	Glutamate-rich WD repeat-containing protein 1	GRWD1;DKFZp564C172	49.346	6	5	0.73513	1.3801	-0.443929	0.464773
O43290;B4DDH9	U4/U6.U5 tri-snRNP-associated protein 1	SART1	90.254	7	7	0.73527	1.2459	-0.443654	0.317188
B7Z700;Q5JR04;Q9HCE1;B3KQ43	Putative helicase MOV-10	MOV10	106.52	7	7	0.73747	1.5815	-0.439344	0.661294
Q08J23	tRNA (cytosine(34)-C(5))-methyltransferase	NSUN2	86.47	3	9	0.74	1.6922	-0.434403	0.7589
Q6PI41;A0A024R0F0;Q9NWT8	Aurora kinase A-interacting protein	AURKAIP1	18.661	2	2	0.74021	1.1903	-0.433993	0.251325
B2RCC2;Q9Y2T7;Q59HE1	Y-box-binding protein 2	YBX2	38.526	9	8	0.74387	1.4009	-0.426878	0.486354
Q96ST3	Paired amphipathic helix protein Sin3a	SIN3A	145.17	15	15	0.74402	1.267	-0.426587	0.341417
Q6P2Q9;B4DK16;Q53GM6	Pre-mRNA-processing-splicing factor 8	PRPF8	273.6	2	5	0.7449	1.3413	-0.424881	0.423632
A8K5Q1;Q7L2J0	7SK snRNA methylphosphate capping enzyme	MEPCE	74.326	6	3	0.74718	1.4913	-0.420472	0.576571
A0A140VK53;Q9UQ35;O60382	Serine/arginine repetitive matrix protein 2	SRRM2;KIAA0324	299.61	23	20	0.74846	1.1325	-0.418003	0.179511
Q86VY4	Testis-specific Y-encoded-like protein 5	TSPYL5	45.143	10	9	0.74892	1.7095	-0.417116	0.773574
B2R9F5;Q96HI0;H7C424;H7C2F8;C9JHT8	Sentrin-specific protease 5	SENP5	86.693	4	2	0.7504	1.2556	-0.414268	0.328377
A0A024R4A0;P19338;B3KTP9;B3KM80;Q6ZS99;Q9BQ02;H7BY16	Nucleolin	NCL	76.613	31	34	0.75096	1.0184	-0.413192	0.0263043
P67809;Q6PKI6;Q7KZ24;H0Y449;A0JLU4	Nuclease-sensitive element-binding protein 1	YBX1	35.924	14	13	0.75326	1.3565	-0.40878	0.439889
P35251;Q14756	Replication factor C subunit 1	RFC1;LLDBP	128.25	13	9	0.75573	1.268	-0.404057	0.342555
A2A2V2;P42696	RNA-binding protein 34	RBM34	45.917	6	4	0.75574	1.1722	-0.404038	0.229219
Q6IQ30;Q13310;B1ANR0;H0Y5F5;Q3B867;Q53GL4;H0YEU6;Q147Y3	Polyadenylate-binding protein;Polyadenylate-binding protein 4	PABPC4	72.36	5	6	0.7562	1.9331	-0.40316	0.950916
Q2TB10;B7Z4V7	Zinc finger protein 800	ZNF800	75.235	10	6	0.7605	1.3349	-0.39498	0.416732
A8K201;Q9Y3B9	RRP15-like protein	RRP15	28.915	3	4	0.76259	1.4775	-0.39102	0.563158
Q9H7E9	UPF0488 protein C8orf33	C8orf33	24.992	4	4	0.76615	1.9124	-0.384301	0.935384
A0A140VKB1;A0A0A0MTN0;Q13617;Q5T2B5;B7Z1Y1	Cullin-2	CUL2	86.982	11	15	0.76715	1.6514	-0.382419	0.72369
E7EMW7;O95071	E3 ubiquitin-protein ligase UBR5	UBR5	308.57	6	5	0.76823	0.86604	-0.38039	-0.207494
A0A087WXM6;J3QQT2;J3KRX5;A0A024R261;A0A0A6YYL6;P18621;J3QLC8;A0A0A0MRF8;J3KRB3;A0A087WWH0;J3QS96;A0A087WY81	60S ribosomal protein L17	RPL17;hCG_24487;RPL17-C18orf32	19.586	14	10	0.76852	0.95135	-0.379845	-0.0719519
E7EPN9;Q9Y520	Protein PRRC2C	PRRC2C	308.77	22	20	0.76987	1.2745	-0.377313	0.349931
G5E9W7;G5E9V5;P82650;Q8NBL6;H7C5F2;H7C5H3;A8K9Y7	28S ribosomal protein S22, mitochondrial	MRPS22	36.805	4	3	0.7705	1.5932	-0.376133	0.671927
Q9BYG3;C9J808;H7BZL0	MKI67 FHA domain-interacting nucleolar phosphoprotein	NIFK	34.222	4	6	0.77173	1.5218	-0.373832	0.605779
Q9BQG0;I3L1L3;B4DE42	Myb-binding protein 1A	MYBBP1A	148.85	28	25	0.77294	1.1941	-0.371572	0.255924
B3KNS8;O75683	Surfeit locus protein 6	SURF6	41.508	8	9	0.77299	1.1828	-0.371478	0.242206
Q5EC54;B4DUQ1;A0A024R228;P61978;Q5T6W2;B4DFF1;B3KU16	Heterogeneous nuclear ribonucleoprotein K	HNRPK;HNRNPK	51.058	6	9	0.7737	2.8544	-0.370154	1.51319
E7ERS3;B4DTK7;Q86VM9	Zinc finger CCCH domain-containing protein 18	ZC3H18	108.94	3	3	0.77596	1.3628	-0.365946	0.446574
C9J4Z3;P61513;M0R0A1;Q6P4E4;E9PEL3;M0R2L6;G5E9R3	60S ribosomal protein L37a	RPL37A	7.624	5	4	0.77652	1.0636	-0.364905	0.0889557
Q6NTA2;P14866;M0QXS5;B2R959;M0QYT0	Heterogeneous nuclear ribonucleoprotein L	HNRNPL	61.926	7	9	0.77753	2.9666	-0.36303	1.56881
A0A0A8K8C0;Q9H6W3	Bifunctional lysine-specific demethylase and histidyl-hydroxylase NO66	URLC2;NO66	71.085	7	9	0.77799	1.1236	-0.362176	0.168129
B3KMC9;Q9H0D6;B4DZC3;B4E0B9	5-3 exoribonuclease 2	XRN2	108.61	12	10	0.77836	1.174	-0.361491	0.231432
A0A024R689;A0A1C7CYX1;Q6PJG2;A0A0A0MSU2;A0PJD3	ELM2 and SANT domain-containing protein 1	C14orf43;ELMSAN1	114.99	7	7	0.77955	1.5971	-0.359287	0.675455
G3V4W0;B4DY08;B2R5W2;G3V4C1;B3KX96;G3V5X6;G3V3K6;G3V251		HNRNPC	28.916	5	6	0.77958	0.84744	-0.359231	-0.238817
Q8N0Z3;B3KX77	Spindle and centriole-associated protein 1	SPICE1	96.263	10	5	0.78031	1.1421	-0.357881	0.191689
A0A024R7T3;P52597;B4DKS8	Heterogeneous nuclear ribonucleoprotein F;Heterogeneous nuclear ribonucleoprotein F, N-terminally processed	HNRPF;HNRNPF	45.671	8	5	0.7804	2.0804	-0.357714	1.05686
P27635;X1WI28;X5D2T3	60S ribosomal protein L10	RPL10	24.604	11	8	0.78232	1.1171	-0.354169	0.159758
P61964	WD repeat-containing protein 5	WDR5	36.588	5	6	0.78268	1.4572	-0.353506	0.543199
A8K5X3;Q6IQ21	Zinc finger protein 770	ZNF770	79.912	3	2	0.78282	1.6001	-0.353247	0.678162
Q5T0F3;Q13823	Nucleolar GTP-binding protein 2	GNL2	83.654	4	5	0.78368	1.535	-0.351663	0.618239
P52701;A0A087WWJ1;Q1L838;F8W7G9;F8WAX8;Q3SWU9	DNA mismatch repair protein Msh6	MSH6;GTBP	152.78	3	3	0.78423	0.80243	-0.350651	-0.317553
Q5JR94;P62241;Q5JR95;Q9BS10	40S ribosomal protein S8	RPS8	24.205	14	16	0.78508	1.0617	-0.349088	0.0863762
A0A1U9X9A5;A0A1U9X987;A0A1U9X9A9;A0A1U9X999;A0A1U9X998;A0A1U9X996;A0A1U9X993;A0A1U9X985;A0A1U9X982;A0A1U9X977;A0A1U9X975;A0A1U9X974;A0A1U9X972;P48634;A0A1U9X988;B4DLY2	Protein PRRC2A	PRRC2A	228.52	9	5	0.78547	0.76167	-0.348372	-0.392762
Q59GY3;V9HVZ0;A8K588;Q13247	Serine/arginine-rich splicing factor 6	HEL-S-91;SRSF6	31.865	5	3	0.78621	1.1007	-0.347013	0.138421
A0A024R9D3;P62888;E5RI99	60S ribosomal protein L30	RPL30	12.784	9	10	0.78658	1.0443	-0.346335	0.0625362
O76021;J3QSV6;A0PJ61;Q32Q62;A0PJ87;I3L3C4;I3L3U9	Ribosomal L1 domain-containing protein 1	RSL1D1	54.972	18	20	0.78744	1.0397	-0.344758	0.0561673
A0A024R8P8;P63173;J3KT73;J3QL01	60S ribosomal protein L38	RPL38	8.2178	6	6	0.78809	0.61478	-0.343568	-0.701858
A0A075B7F8;A8CG34;Q96HA1;A0A087WY75	Nuclear envelope pore membrane protein POM 121C;Nuclear envelope pore membrane protein POM 121	POM121C;POM121	125.09	2	1	0.79368	1.5039	-0.333371	0.588709
Q9Y230;B3KNL2;M0R0Y3	RuvB-like 2	RUVBL2	51.156	10	11	0.79607	1.5394	-0.329033	0.622368
H0YMD0;H0YMU9;H0YN42;V9HW65;A0A024R5Z7;P07355;H0YMM1;H0YKS4;B4DNH8;H0YM50;A6NMY6;H0YNA0;H0YKV8;H0YKL9;H0YKZ7;H0YLV6;H0YMT9;H0YKX9;H0YN28;H0YL33;H0YMW4;H0YNP5;B3KRQ1	Annexin;Annexin A2;Putative annexin A2-like protein	ANXA2;HEL-S-270;ANXA2P2	25.341	2	6	0.7967	6.5316	-0.327892	2.70744
P49711	Transcriptional repressor CTCF	CTCF	82.785	7	10	0.79767	1.1378	-0.326136	0.186247
B7Z6D5;B3GQE6;Q96GQ7;Q53G15	Probable ATP-dependent RNA helicase DDX27	DDX27	86.604	11	11	0.79838	1.3593	-0.324853	0.442864
A0A087WX29;B4DRW3;A0A0A0N0L3;A0A024R4E2;Q13148;B1AKP7;G3V162;A0A087X260;A0A087WYY0;A0A087WW61;A0A087WX67;A0A087WXV3;A0A087WXQ5;K7EJM5;A0A087WV68;A0A0A0N0N3;A0A0A0N0M3;K7EN94	TAR DNA-binding protein 43	TARDBP;TDP43	26.743	2	3	0.80195	2.2763	-0.318416	1.18669
Q06210	Glutamine--fructose-6-phosphate aminotransferase [isomerizing] 1	GFPT1	78.806	3	2	0.80421	1.2329	-0.314356	0.302056
B3KP47;A0A024R5U8;Q9UHA3;H3BMQ2	Probable ribosome biogenesis protein RLP24	C15orf15;RSL24D1	19.568	2	2	0.80528	0.9904	-0.312438	-0.0139168
P18077;C9K025;F8WBS5;F8WB72	60S ribosomal protein L35a	RPL35A	12.538	10	10	0.81166	1.0868	-0.301053	0.120086
Q86X95;A0PJI7	Corepressor interacting with RBPJ 1	CIR1;CIR	52.313	5	5	0.81231	1.0653	-0.299898	0.0912598
H0YKD8;P46779;H0YMF4;Q59F34;H0YLP6	60S ribosomal protein L28	RPL28	19.072	10	12	0.81458	0.94247	-0.295872	-0.0854814
B3KY11;A8KA56;A0A024R0Z3;Q9BUQ8	Probable ATP-dependent RNA helicase DDX23	DDX23	93.233	5	3	0.82121	1.583	-0.284177	0.662661
J3QR09;J3KTE4;Q53G49;P84098;Q8IWR8	Ribosomal protein L19;60S ribosomal protein L19	RPL19	23.134	10	10	0.82168	1.0005	-0.283351	0.000721167
Q14684	Ribosomal RNA processing protein 1 homolog B	RRP1B	84.427	5	6	0.82287	1.1884	-0.281264	0.249021
A8K3X2;Q15633;A0A024RB49;H3BV98;F8VSA1;F8VZ57	RISC-loading complex subunit TARBP2	TARBP2	39.013	4	2	0.823	1.1635	-0.281036	0.218471
E9PB61;Q86V81	THO complex subunit 4	ALYREF	27.557	2	4	0.8231	2.8205	-0.28086	1.49595
J9JIC7;J3QSH4;Q14119	Vascular endothelial zinc finger 1	VEZF1	37.32	1	3	0.82439	1.0254	-0.278601	0.0361868
Q96DV6;A2A3R6;P62753;A2A3R5	40S ribosomal protein S6	RPS6	28.708	14	14	0.82463	1.1022	-0.278181	0.140386
Q53SY7;F8VPD4;P27708	CAD protein;Glutamine-dependent carbamoyl-phosphate synthase;Aspartate carbamoyltransferase;Dihydroorotase	CAD	235.18	4	3	0.82493	1.1045	-0.277656	0.143393
Q6IB29;H7C2Q8;Q99848;B4DHA6;B4DRX8	Probable rRNA-processing protein EBP2	EBNA1BP2	34.852	11	8	0.82718	1.1184	-0.273727	0.161436
A0A024R101;Q86XZ4	Spermatogenesis-associated serine-rich protein 2	SPATS2	59.544	2	3	0.82933	1.8649	-0.269982	0.899098
P62917;B4DVG7;E9PKZ0;E9PKU4;G3V1A1	60S ribosomal protein L8	RPL8	28.024	13	13	0.83041	1.0414	-0.268104	0.0585243
O60318;B7Z8Z8	Germinal-center associated nuclear protein	MCM3AP	218.4	4	4	0.83319	1.1587	-0.263283	0.212507
A4QPB0;A0A024RC65;P46940;H0YLE8;B4E2M0;Q6P1N4;A0A0J9YXZ5	Ras GTPase-activating-like protein IQGAP1	IQGAP1;hCG_1991735	189.28	6	8	0.83324	0.99433	-0.263196	-0.00820336
A8K4Z4;A0A024RBS2;P05388;Q6NSF2;F8VWS0;Q53HK9;F8VU65;Q53HW2;F8VPE8;G3V210;F8VW21;F8VQY6;F8VRK7;F8VZS0;F8VWV4;F8VS58;B4E3D5;Q8NHW5	60S acidic ribosomal protein P0;60S acidic ribosomal protein P0-like	RPLP0;RPLP0P6	34.239	12	13	0.83378	1.6916	-0.262261	0.758388
Q4VB24;B2R984;A3R0T8;P10412;A3R0T7	Histone H1.4	HIST1H1E	21.893	9	11	0.8365	1.2913	-0.257563	0.368824
B4DLR3;A0A1W2PPS1;Q00839;Q96BA7;A0A1W2PP35;B3KX72;Q5RI18;A0A1W2PQD4;Q7Z4Q5;A0A1W2PQL0;A0A1W2PP34;A0A1W2PPL4;A0A1W2PPH7;A0A1W2PRZ7;A0A1W2PQ74	Heterogeneous nuclear ribonucleoprotein U	HNRNPU;HNRPU	86.86	7	6	0.8369	2.7722	-0.256873	1.47103
B5BU99;Q9Y5A9	YTH domain-containing family protein 2	YTHDF2	61.319	5	5	0.83721	1.0939	-0.256339	0.129481
Q5HY54;P21333;Q60FE6;Q60FE5;A6NDY9;A0A087WWY3;Q8TES4	Filamin-A	FLNA;FLJ00119	276.55	3	20	0.83807	3.8201	-0.254857	1.93361
Q5RKV6	Exosome complex component MTR3	EXOSC6	28.235	2	2	0.84437	1.6348	-0.244053	0.709114
Q9P1Y5;D6W648	Calmodulin-regulated spectrin-associated protein 3	CAMSAP3;hCG_2004001	134.75	6	3	0.84613	1.0384	-0.241049	0.0543623
A4FVC0;Q9UKV8	Protein argonaute;Protein argonaute-2	EIF2C2;AGO2	91.495	6	8	0.85072	1.2309	-0.233244	0.299714
C9JQV0;Q9BRJ6;A0A024R836;H7C0T1;H7C2R9	Uncharacterized protein C7orf50	C7orf50;MGC11257	21.883	8	6	0.85144	1.0419	-0.232023	0.0592168
Q15397;B2RDG4	Pumilio domain-containing protein KIAA0020	KIAA0020	73.584	3	2	0.85343	1.2521	-0.228655	0.32435
Q8TBK5;Q8N5Z7;A0A024RBK3;Q9HBB3;Q02878;B2R4K7;B4DRX3	60S ribosomal protein L6	RPL6	32.741	19	21	0.85351	1.1447	-0.22852	0.19497
Q6IT96;Q13547;B5BU61;Q5TEE2;B4DSK9;B7Z3S4	Histone deacetylase;Histone deacetylase 1	HDAC1	55.102	6	6	0.85429	1.3665	-0.227202	0.450485
B4DED6;B4DW97;Q9BQ39;A0A087WVC1;K0J110;Q53FI9	ATP-dependent RNA helicase DDX50	DDX50;mcdrh	72.157	3	4	0.8549	1.187	-0.226172	0.24732
B4DZP5;Q16531;B4DSA8;F5GY55;B7Z2A1	DNA damage-binding protein 1	DDB1	91.985	8	7	0.85684	1.1674	-0.222902	0.223299
Q92615	La-related protein 4B	LARP4B	80.551	4	2	0.85719	1.0349	-0.222313	0.0494914
Q9UPY3	Endoribonuclease Dicer	DICER1	218.68	11	10	0.85744	1.0288	-0.221892	0.0409625
O75643;A4FU77	U5 small nuclear ribonucleoprotein 200 kDa helicase	SNRNP200	244.5	4	8	0.85763	1.8981	-0.221573	0.924556
P30050;Q59FI9	60S ribosomal protein L12	RPL12	17.818	8	8	0.85817	1.2258	-0.220665	0.293724
Q9NR30	Nucleolar RNA helicase 2	DDX21	87.343	44	43	0.86138	1.002	-0.215278	0.00288251
A8K800;Q9H7B2;Q5VXN0;B4DWS5	Ribosome production factor 2 homolog	RPF2	35.572	6	6	0.86343	0.97187	-0.211849	-0.0411647
P16401	Histone H1.5	HIST1H1B	22.58	14	14	0.86356	1.1807	-0.211632	0.239642
A2RUM7;P46777;B3KTM6	60S ribosomal protein L5	RPL5	34.362	21	23	0.86519	1.1105	-0.208911	0.151209
A0A024RB76;Q9BRT6	Protein LLP homolog	C12orf31;LLPH	15.225	2	2	0.8667	0.92734	-0.206395	-0.10883
P39023;Q8TBW1;Q96QL0;Q9NY85;G5E9G0;B3KS36;Q9BT63;Q49AJ9;H7C422;B5MCW2;H7C3M2	60S ribosomal protein L3	RPL3;rpl3	46.108	26	25	0.86703	1.0051	-0.205846	0.00733905
A0A090N7X1;A0A090N7Y2;Q9UG63	ATP-binding cassette sub-family F member 2	ABCF2	71.289	11	9	0.86719	0.9751	-0.20558	-0.0363779
Q5H909;A0A024R9Y7;Q9UNF1;Q5H907;B4DNG7;B4DX55	Melanoma-associated antigen D2	MAGED2	63.138	3	4	0.86738	1.2631	-0.205264	0.336969
B4DMA2;B4DGL0;A0A024RD80;P08238;Q6PK50;Q9H6X9;A8K3W9	Heat shock protein HSP 90-beta	HSP90AB1	79.194	3	9	0.86798	2.3015	-0.204266	1.20257
P62424;Q9BY74;Q5T8U2;Q5T8U3	60S ribosomal protein L7a	RPL7A;RP-L7a	29.995	20	20	0.86848	1.152	-0.203435	0.204141
Q6FHM2;P62879;C9JZN1;C9JIS1;C9JXA5;E7EP32;Q9HAV0	Guanine nucleotide-binding protein G(I)/G(S)/G(T) subunit beta-2;Guanine nucleotide-binding protein subunit beta-4	GNB2;GNB4	37.331	4	4	0.87029	1.1196	-0.200432	0.162983
P31689;B7Z5C0	DnaJ homolog subfamily A member 1	DNAJA1	44.868	6	2	0.87123	0.9017	-0.198874	-0.149281
A0A0A0MS70;H0Y4G9;A0A0A0MST0;Q99836;B4DU08;A0A0A0MSI9;B4E3D6	Myeloid differentiation primary response protein MyD88	MYD88	34.58	2	2	0.87218	0.95085	-0.197302	-0.0727103
F8W1R7;G3V1V0;P60660;F8VPF3;J3KND3;G8JLA2;F8W1I5;A0A024RB31;B4E368;B7Z6Z4;P14649	Myosin light polypeptide 6;Myosin light chain 6B	MYL6;MYL6B	16.29	2	2	0.87274	3.7004	-0.196376	1.88768
P42766;F2Z388;A0A024R866	60S ribosomal protein L35	RPL35	14.551	7	6	0.87547	0.94949	-0.19187	-0.0747753
A0A024RDH8;P49207	60S ribosomal protein L34	RPL34	13.293	8	10	0.87761	1.0275	-0.188348	0.0391384
P16402	Histone H1.3	HIST1H1D	22.35	3	3	0.88011	1.13	-0.184244	0.176323
B5MCF9;B2RDF2;O00541;B3KXD6	Pescadillo homolog	PES1	66.077	5	7	0.88068	1.2954	-0.18331	0.373398
O94906	Pre-mRNA-processing factor 6	PRPF6	106.92	5	6	0.88098	1.4081	-0.182819	0.49375
B5BUB1;Q9Y265;E7ETR0;B3KRS7	RuvB-like 1	RUVBL1	50.215	8	6	0.88113	1.7715	-0.182573	0.824971
B4DKE6;Q5U0C2;Q53HK8;A0A024RDQ8;P40938;A0A087X270	Replication factor C subunit 3	RFC3	34.832	3	2	0.88211	1.0856	-0.18097	0.118493
Q59GX9			35.203	2	2	0.88341	1.1974	-0.178845	0.259905
A0A087WT48;A0A024R6S1;O60884	DnaJ homolog subfamily A member 2	DNAJA2	14.688	2	2	0.88546	0.89382	-0.175501	-0.161944
I3L1P8;Q6IBH0;Q02978	Mitochondrial 2-oxoglutarate/malate carrier protein	SLC25A11	32.182	7	5	0.886	0.7503	-0.174621	-0.414461
C9JXB8;C9JNW5;V9HW01;P83731	60S ribosomal protein L24	RPL24;HEL-S-310	14.369	7	11	0.88727	0.90898	-0.172555	-0.13768
E4W6B6;B2R4D8;A0A024R1V4;P61353;K7ELC7;K7EQQ9	60S ribosomal protein L27	RPL27	14.257	6	6	0.89082	0.95919	-0.166794	-0.0601115
P62906;Q1JQ76	60S ribosomal protein L10a;Ribosomal protein	RPL10A	24.831	14	14	0.89211	0.98861	-0.164706	-0.0165266
Q15050	Ribosome biogenesis regulatory protein homolog	RRS1	41.193	8	9	0.89216	1.1197	-0.164626	0.163112
V9HVZ4;P04406;Q0QET7;E7EUT5;Q2TSD0;A4UCT1;B4DRV9	Glyceraldehyde-3-phosphate dehydrogenase	HEL-S-162eP;GAPDH	36.053	3	4	0.89359	7.6806	-0.162315	2.94122
Q9BQ90;Q96GH7;E7ERR0;Q8N7S8;B4DYA4;Q8IVW5;F8W6A4	Kelch domain-containing protein 3	KLHDC3	43.087	14	12	0.89393	1.3849	-0.161766	0.469782
B4DQZ7;S4R3H4;E7EQT4;Q9UKV3;Q69YJ6;G3V3B0;G3V3T3	Apoptotic chromatin condensation inducer in the nucleus	ACIN1;DKFZp667N107	122.56	4	5	0.89878	1.603	-0.15396	0.680774
H3BV80;H3BMM9;H3BTC0;D3DU92;Q15287;H3BMS0;A0A024R9P1	RNA-binding protein with serine-rich domain 1	RNPS1;hCG_2026745	24.561	2	2	0.8992	1.0921	-0.153286	0.127105
A0A024R814;P18124;A8MUD9;O95036	60S ribosomal protein L7	RPL7;WUGSC:H_RG054D04.1	30.438	19	20	0.90134	1.0748	-0.149857	0.104068
Q6ICQ4;A0A024R608;P05386;Q7Z612;Q6FG99	60S acidic ribosomal protein P1	RPLP1	11.5	3	3	0.90236	4.9155	-0.148225	2.29734
Q5T749	Keratinocyte proline-rich protein	KPRP	64.135	10	8	0.90605	1.537	-0.142337	0.620117
A0A024RAC5;Q9P258;A5PLK7	Protein RCC2	RCC2	56.084	6	3	0.90919	0.87455	-0.137346	-0.193387
A0A024R2V0;E7EVA0;P27816;Q86Y04;H0Y2V1;H7C4C5;F8W9U4;Q8NDS5;B4DSQ1;B5MEG9	Microtubule-associated protein;Microtubule-associated protein 4	MAP4;DKFZp547H1810	60.598	4	5	0.9092	1.6049	-0.13733	0.682483
Q7Z3K9;E9PPJ0;Q13435	Splicing factor 3B subunit 2	DKFZp781L0540;SF3B2	90.022	5	4	0.91251	1.068	-0.132088	0.0949116
B2R7T8;B1AK87;B1AK88;B4DWA6;P47756;Q7L4N0;B1AK85	F-actin-capping protein subunit beta	CAPZB	30.656	3	4	0.91333	1.2526	-0.130792	0.324926
F4ZW64;A8K590;F4ZW65;A0A024R7C7;F4ZW66;Q12906;B4DFG4	Interleukin enhancer-binding factor 3	ILF3	75.96	2	4	0.91728	1.5428	-0.124566	0.625551
P36578;Q59GY2;B4DMJ6;H3BM89;Q53G74;B4DMJ2;B4DFI6	60S ribosomal protein L4	RPL4	47.697	29	30	0.91817	0.99797	-0.123167	-0.00293165
Q9BU76	Multiple myeloma tumor-associated protein 2	MMTAG2	29.411	5	8	0.91956	1.2575	-0.120984	0.330558
Q13509;Q9BV28;Q53G92;B2RBD5;A0A0B4J269;Q3ZCR3	Tubulin beta-3 chain	TUBB3	50.432	4	4	0.91961	0.87004	-0.120906	-0.200846
P40429;Q9BSQ6;Q5QTS3;M0QYS1;Q53H34;Q8J015	60S ribosomal protein L13a	RPL13A;RPL13a	23.577	13	11	0.92245	1.0499	-0.116457	0.0702519
B8ZZU8;Q15370;I3L0M9;A0A0B4J296	Transcription elongation factor B polypeptide 2	TCEB2	12.527	8	7	0.92511	1.3144	-0.112303	0.394404
A0A140TA76;Q8ND56;A0A0G2JQ95;A0A096LP11;K7EMZ9	Protein LSM14 homolog A	LSM14A	38.018	3	2	0.92577	1.0494	-0.111274	0.0695647
Q9NVI7;H0Y2W2;Q96T67	ATPase family AAA domain-containing protein 3A	ATAD3A	71.368	5	3	0.9264	0.97627	-0.110293	-0.0346479
P05023;B7Z3V1;B7Z1Q9;M0R116;Q53ES0;B7Z9V4;A0A0A0MT26;P13637;B3KV59;B3KRI1;B7Z3F8;B1AKY9;B2RAQ4;A0A0S2Z3W6;P50993;B7Z1N5;B3KNQ8;B3KX35;H0Y7C1;B4DIQ8	Sodium/potassium-transporting ATPase subunit alpha-1;Sodium/potassium-transporting ATPase subunit alpha-3;Sodium/potassium-transporting ATPase subunit alpha-2	ATP1A1;ATP1A3;ATP1A2	112.89	7	3	0.92968	1.1179	-0.105194	0.160791
H7BXF5;Q9H0E3;Q96DP1;B3KRT9	Histone deacetylase complex subunit SAP130	SAP130	111.28	3	6	0.92985	1.2365	-0.10493	0.306262
Q9H7L9	Sin3 histone deacetylase corepressor complex component SDS3	SUDS3	38.136	5	5	0.93007	1.0266	-0.104589	0.0378742
E9PJH7;Q9H936;A0A0D9SFA8;K4DIB0;K4DIA2;A0A0D9SG84;E9PI74;E9PQ36;K4DIB6;K4DIB3;K4DIB8;K4DIA8;A0A0D9SEI9;A0A0D9SFE1;A0A024RCA6;A0A024R0W0;Q9H1K4	Mitochondrial glutamate carrier 1;Mitochondrial glutamate carrier 2	SLC25A22;SLC25A18	33.281	2	2	0.93015	1.1695	-0.104465	0.225892
U3KQ83;U3KPX3;H0Y9X2;U3KQK7;B4E1D9;B4DER9;V9HW00;P48729	Casein kinase I isoform alpha	CSNK1A1;HEL-S-77p	11.105	1	1	0.93172	1.044	-0.102032	0.0621217
Q9Y3I0;B4DNA0	tRNA-splicing ligase RtcB homolog	RTCB	55.21	6	5	0.9337	1.3173	-0.098969	0.397584
Q6IBH6;P61254;J3QRI7;J3QQQ9;J3QQV1;J3KTJ8;J3QRC4;A0A024RBF6	60S ribosomal protein L26	RPL26;hCG_26523	17.244	13	9	0.93405	1.1115	-0.0984283	0.152508
B3KXK2;A0A024RD50;Q05GC8;Q96PN7	Transcriptional-regulating factor 1	TRERF1;BCAR2	129.52	3	3	0.93416	0.85251	-0.0982584	-0.230211
A4D177;Q13185	Chromobox protein homolog 3	CBX3	20.811	3	5	0.93769	3.7318	-0.092817	1.89987
Q5QP82;A0A0A0MQT4	DDB1- and CUL4-associated factor 10	DCAF10	60.581	10	9	0.93898	1.145	-0.0908337	0.195348
P35908	Keratin, type II cytoskeletal 2 epidermal	KRT2	65.432	1	1	0.93966	1.0327	-0.0897893	0.0464212
A0A0A0MQW0;A0A0A0MR39;Q9P2K5;Q9Y655;A0A0C4DGV1;H0YN19;A0A024R5Q6;A0A087WUT0	Myelin expression factor 2	MYEF2	61.957	4	2	0.94197	1.1455	-0.086247	0.195977
Q6FI35;Q6FHF5;P12004	Proliferating cell nuclear antigen	PCNA	28.715	4	5	0.94523	1.7092	-0.0812627	0.773321
J3KTL2;Q07955;Q59FA2;J3KSR8;A8K1L8	Serine/arginine-rich splicing factor 1	SRSF1	28.329	3	6	0.94694	1.8384	-0.0786551	0.878451
P82663;E7EPW2	28S ribosomal protein S25, mitochondrial	MRPS25	20.116	2	1	0.94864	1.0481	-0.0760674	0.0677764
A0A024R2Q4;P61313;B4DLP4;E7EQV9;E7ENU7	Ribosomal protein L15;60S ribosomal protein L15	RPL15	24.146	14	13	0.94876	1.0564	-0.0758849	0.0791562
Q6FI91;Q9H0U9;B4DN10	Testis-specific Y-encoded-like protein 1	TSPYL;TSPYL1	49.306	4	3	0.94914	1.0106	-0.0753072	0.0152121
A0A0A0MR02;A0A024QZT0;A0A024QZN9;P45880;Q5JSD2;Q5JSD1;B4DKM5	Voltage-dependent anion-selective channel protein 2	VDAC2	30.348	5	3	0.9493	1.0301	-0.075064	0.0427844
A0A024R1N4;P12956;B4DE32;B1AHC9;B2RDN9;B4E356	X-ray repair cross-complementing protein 6	XRCC6	69.842	7	9	0.95584	1.2733	-0.065159	0.348572
B4DE59;K7EMS3		KRT19	62.615	5	2	0.95596	1.8063	-0.0649778	0.853038
V9HWC2;Q99497;K7ELW0;K7EN27	Protein deglycase DJ-1	HEL-S-67p;PARK7	19.891	4	3	0.95605	0.74388	-0.064842	-0.426858
A0A024QZD1;J3QQ67;Q07020;G3V203;Q0QEW2;H0YHA7;F8VYV2;B4DDY5;A0A075B7A0;F8VUA6	60S ribosomal protein L18	RPL18	21.634	11	12	0.95772	1.0338	-0.0623242	0.0479571
P62877	E3 ubiquitin-protein ligase RBX1;E3 ubiquitin-protein ligase RBX1, N-terminally processed	RBX1	12.274	4	4	0.95975	1.2789	-0.0592694	0.354903
Q96BS4;P22087;M0R299;M0QXL5;M0R2Q4;B4DLD4;M0R2U2;M0R1H0;M0R2B0;M0R0P1	rRNA 2-O-methyltransferase fibrillarin	FBL	28.449	6	4	0.96119	1.0606	-0.0571065	0.0848807
Q7Z6E9	E3 ubiquitin-protein ligase RBBP6	RBBP6	201.56	7	8	0.96394	1.0159	-0.0529847	0.0227584
B4DDH8;Q96N66	Lysophospholipid acyltransferase 7	MBOAT7	50.563	2	3	0.96629	0.83125	-0.0494719	-0.266646
Q6IAX2;P46778;G3V1B3;M0R181	60S ribosomal protein L21	RPL21	18.565	8	7	0.9668	0.91936	-0.0487106	-0.121298
Q6FHJ5;O14828	Secretory carrier-associated membrane protein 3	SCAMP3	38.242	6	3	0.9678	0.73843	-0.0472192	-0.437467
E9PCY7;G8JLB6;P31943;D6RIU0;D6RBM0;E7EQJ0;D6RAM1;D6R9T0;D6RFM3;D6RIT2;D6RDU3;D6RJ04;D6RIH9;E5RGV0;E7EN40	Heterogeneous nuclear ribonucleoprotein H;Heterogeneous nuclear ribonucleoprotein H, N-terminally processed	HNRNPH1	47.087	7	7	0.9688	1.7363	-0.0457292	0.796016
Q6I9V5;P12236;Q59EI9	ADP/ATP translocase 3;ADP/ATP translocase 3, N-terminally processed	SLC25A6	32.866	7	6	0.97079	1.0799	-0.0427688	0.110898
P51571;A6NLM8	Translocon-associated protein subunit delta	SSR4	18.998	4	5	0.97577	1.1066	-0.035387	0.146134
A8K7N0;Q6IPH7;P50914;A8K3Q9;E7EPB3;A0PJ62;B7Z6S8	60S ribosomal protein L14	RPL14	23.646	11	12	0.9769	1.1383	-0.0337172	0.186881
Q9Y3U8;J3QSB5	60S ribosomal protein L36	RPL36	12.254	9	9	0.97861	0.91157	-0.0311941	-0.133575
Q59GX7;O00767	Acyl-CoA desaturase	SCD	42.337	2	2	0.98337	0.64153	-0.0241938	-0.640411
Q3ZCM7;A0A075B736;Q5SQY0;A0A183YE00	Tubulin beta-8 chain	TUBB8	49.775	2	2	0.98611	1.2581	-0.0201795	0.331247
Q02413	Desmoglein-1	DSG1	113.75	5	2	0.98773	1.6792	-0.0178114	0.747774
M0R117;B4DM74;Q02543;M0R3D6;M0R1A7;B2R4C0;Q53HD3;M0R0P7;B4DM94;B4DUV3;Q32XH3	60S ribosomal protein L18a	RPL18A	18.079	13	11	0.98907	1.0351	-0.0158555	0.0497702
P13639;B4DPU3;Q8TA90;B4DRE8;Q6PK56	Elongation factor 2	EEF2	95.337	5	8	0.993	2.5759	-0.0101344	1.36508
V9HWB8;P14618;A0A024R609;H3BTN5;A0A024R5Z9;H3BQ34;B4DNK4;H3BT25;H3BUW1;H3BTJ2;B4DRT3	Pyruvate kinase;Pyruvate kinase PKM	HEL-S-30;PKM;PKM2	57.936	3	6	0.99353	2.6358	-0.00936456	1.39824
Q96JK2	DDB1- and CUL4-associated factor 5	DCAF5	103.96	8	7	0.99354	1.0375	-0.00935004	0.0531113
Q15366;H3BRU6;B4DLC0;F8VZX2;B4DRD7;F8W0G4;F8VXH9;F8W1G6;J3QT27;Q5MJP6;E9PFP8;P57721	Poly(rC)-binding protein 2;Poly(rC)-binding protein 3	PCBP2;PCBP3	38.58	4	4	0.99371	2.0454	-0.00910321	1.03238
F8VU51;P49750;H0YIQ2;Q8NF45	YLP motif-containing protein 1	YLPM1;FLJ00353	160.74	3	3	0.99967	1.3846	-0.000476168	0.469469
Q53GR7;Q9UJS0;B7Z2E2	Calcium-binding mitochondrial carrier protein Aralar2	SLC25A13	74.116	5	6	1.0007	1.4824	0.00100953	0.567935
Q0VGD6;Q6MZS5;O43390;B2R7W4;B4DMD1;B4DT28;B4DMB1	Heterogeneous nuclear ribonucleoprotein R	HNRPR;DKFZp686A13234;HNRNPR	67.86	3	3	1.0067	3.6586	0.00963382	1.87129
P07305	Histone H1.0;Histone H1.0, N-terminally processed	H1F0	20.863	6	7	1.0069	1.056	0.00992041	0.0786098
V9HW22;P11142;E9PKE3;Q53GZ6;Q53HF2;Q96IS6;B3KTV0;E9PN89;E9PNE6;B4DTX2;B4E1Q1;E9PLF4	Heat shock cognate 71 kDa protein	HEL-S-72p;HSPA8	70.897	27	28	1.0126	1.575	0.0180644	0.655352
O75179;H0YM23;B4DTP3	Ankyrin repeat domain-containing protein 17	ANKRD17	274.25	18	15	1.0144	1.1259	0.0206267	0.171079
A0A0R4J2E8;A8MXP9;P43243;Q68D11;D6REM6;D6R991	Matrin-3	MATR3;DKFZp686K23100	94.622	10	7	1.0166	1.5215	0.0237521	0.605494
Q15004;G9G6H1;G9G6D7;A0A0U1RQC1;H0YKX3;H0YMA4;A0A0U1RQM0	PCNA-associated factor	KIAA0101	11.986	2	2	1.0185	0.9842	0.026446	-0.0229766
A0A024R1P7;B4E2A6;Q9UH99;B4DIU6;A8K129;Q6NT72	SUN domain-containing protein 2	UNC84B;SUN2	80.31	3	7	1.0239	0.85981	0.0340748	-0.21791
A0A024QZW7;P49790	Nuclear pore complex protein Nup153	NUP153	153.97	2	8	1.0252	0.96343	0.0359054	-0.0537482
A8K5I0;A0A0G2JIW1;P0DMV9;P0DMV8;A0A1U9X7W4;Q59EJ3;B4DFN9;B4DNT8;B4DI39;B4E388;B4DWK5;B4DVU9;B4E1S9;V9GZ37;B3KTT5;B4E1T6;B4DNX1	Heat shock 70 kDa protein 1B;Heat shock 70 kDa protein 1A	HEL-S-103;HSPA1B;HSPA1A	70.051	23	19	1.0298	1.0474	0.0423642	0.0668125
P63261;B4E3A4;B4DVQ0;I3L3I0;I3L1U9;I3L4N8	Actin, cytoplasmic 2;Actin, cytoplasmic 2, N-terminally processed	ACTG1	41.792	7	18	1.0309	4.3204	0.0439044	2.11116
Q6NZ55;A8K4C8;P26373;J3QSB4	60S ribosomal protein L13	RPL13	24.265	13	11	1.0323	1.0042	0.0458623	0.00604663
P61962;B4DH46	DDB1- and CUL4-associated factor 7	DCAF7	38.926	6	7	1.049	1.1036	0.0690147	0.142217
Q9GZV0;A0A024R0K2;A0A024R0E2;O75534;Q96L66;E9PLT0	Cold shock domain-containing protein E1	CSDE1;UNR	85.729	5	6	1.0492	1.3557	0.0692897	0.439038
A0A0A0MR59;B7ZL34;A0A0C4DG68;Q8TB72	Pumilio homolog 2	PUM2	99.645	4	3	1.0498	0.81225	0.0701145	-0.300004
B2R6F3;P84103;A0A087X2D0	Serine/arginine-rich splicing factor 3	SFRS3;SRSF3	19.329	3	4	1.0502	2.1032	0.0706641	1.07259
P15924;Q4LE79;B4E2A0	Desmoplakin	DSP;DSP variant protein	331.77	23	18	1.0507	0.8597	0.0713508	-0.218095
Q53SS8;Q15365	Poly(rC)-binding protein 1	PCBP1	37.497	11	11	1.0514	1.3141	0.0723116	0.394075
A0A0S2Z3L2;P16615;H7C5W9	Sarcoplasmic/endoplasmic reticulum calcium ATPase 2	ATP2A2	114.76	11	9	1.0539	1.0873	0.075738	0.12075
A0A024R856;H9KVB4;O15417	Trinucleotide repeat-containing gene 18 protein	hCG_96198;TNRC18	287.31	29	23	1.0547	1.0478	0.0768327	0.0673634
Q14257;H0YL43	Reticulocalbin-2	RCN2	36.876	3	3	1.0589	0.96615	0.0825664	-0.0496809
P05141;Q6NVC0	ADP/ATP translocase 2;ADP/ATP translocase 2, N-terminally processed	SLC25A5	32.852	14	14	1.061	0.94523	0.0854247	-0.0812627
Q6NZ52;P46776;Q9BQQ5;E9PLL6;E9PJD9	60S ribosomal protein L27a	RPL27A;L27a	16.478	8	8	1.0622	0.93165	0.0870554	-0.10214
K7EIS0;A0A1B4Z394;Q9NRH3;P23258;K7EKE5	Tubulin gamma chain;Tubulin gamma-2 chain;Tubulin gamma-1 chain	TUBG1;TUBG2	29.587	2	3	1.0652	1.1558	0.0911243	0.208892
B4DZ22;B4DL07;P28288	ATP-binding cassette sub-family D member 3	ABCD3	67.358	2	2	1.067	0.81366	0.0935602	-0.297502
Q6IBR2;Q9Y285;K7ER00;K7ER16	Phenylalanine--tRNA ligase alpha subunit	FARSLA;FARSA	57.563	7	7	1.0682	0.82253	0.0951818	-0.28186
P42166	Lamina-associated polypeptide 2, isoform alpha;Thymopoietin;Thymopentin	TMPO	75.491	23	22	1.069	0.52991	0.0962619	-0.916181
E7EX90;Q6MZZ3;Q14203;Q6AWB3;Q6AWB1;Q59F36	Dynactin subunit 1	DCTN1;DKFZp686I0746;DKFZp686E191;DKFZp686E0752	139.09	9	12	1.0709	0.9464	0.0988238	-0.079478
B3KVN0;B4DKW1;Q0P512;Q59GX2;P11166;B4DDR6	Solute carrier family 2, facilitated glucose transporter member 1	SLC2A1	45.869	4	3	1.071	0.67993	0.0989585	-0.556542
H7C463;C9J406;B4DS66;B9A067;B4DKR1;Q16891;B4DQY2;B4DT20	MICOS complex subunit MIC60	IMMT	68.064	4	5	1.0723	1.0748	0.100709	0.104068
Q6LAP8;D9HTE9;P53007;B4DP62	Tricarboxylate transport protein, mitochondrial	SLC25A1	34.787	9	10	1.0766	0.82044	0.106482	-0.28553
A0A024R326;Q6IPI1;P47914	60S ribosomal protein L29	RPL29	17.553	3	3	1.0775	1.0435	0.107688	0.0614306
P52272;A0A087X0X3;Q7KYM9;Q59ES8	Heterogeneous nuclear ribonucleoprotein M	HNRNPM;ORF	77.515	38	43	1.0793	0.97319	0.110096	-0.0392066
B7Z1X9;A4D1N4;C9JRZ6;F8WAR4;Q9NX63	MICOS complex subunit MIC19	CHCHD3	15.611	2	3	1.0804	1.0463	0.111566	0.0652966
C9JUG7;F8W9N7;Q53GE2;Q53GC7;A4D0V4;P47755;A0A0D9SET8	F-actin-capping protein subunit alpha-2	CAPZA2	16.698	2	3	1.0807	1.9414	0.111966	0.957097
Q8N5F7	NF-kappa-B-activating protein	NKAP	47.138	4	4	1.0807	0.99487	0.111966	-0.00742007
H9KV28;A0RZB8;A0A140T8Z0;Q6URC4;A0A0G2JH68;O60610;A0A1E1ERW3	Protein diaphanous homolog 1	DIAPH1	136.85	4	4	1.0862	0.54115	0.11929	-0.8859
Q8TEN0;A0A024R254;Q9Y5V3	Melanoma-associated antigen D1	FLJ00163;MAGED1	56.312	6	6	1.0927	1.0608	0.127897	0.0851527
P21912;A0A087WWT1;A0A087WXX8	Succinate dehydrogenase [ubiquinone] iron-sulfur subunit, mitochondrial	SDHB	31.629	10	12	1.0944	1.2701	0.13014	0.344942
Q8IWZ3;E9PDP5;Q8TEF1	Ankyrin repeat and KH domain-containing protein 1	ANKHD1;FLJ00246	269.45	45	45	1.0944	0.98473	0.13014	-0.0221999
A0A0C4DGS1;A0A024RAD5;P39656;U3KQ84	Dolichyl-diphosphooligosaccharide--protein glycosyltransferase 48 kDa subunit	DDOST	48.799	3	3	1.0968	0.97862	0.1333	-0.0311793
H7BXI1;A0A087WXU3;A0FGR8	Extended synaptotagmin-2	ESYT2	98.008	4	5	1.0986	0.9221	0.135666	-0.117005
A0A024QZ30;P31040;D6RFM5;Q0QF12;B3KT34;B4DYN5;A0A087X1I3	Succinate dehydrogenase [ubiquinone] flavoprotein subunit, mitochondrial	SDHA	72.691	14	16	1.1006	0.98452	0.13829	-0.0225076
E9PE17;Q8IY71;I3L0E3;Q9Y2R5	28S ribosomal protein S17, mitochondrial	MRPS17;hCG_1984214	14.374	2	3	1.1044	1.1866	0.143263	0.246834
A0A1L1UHR1;P21796;B3KTS5;C9JI87	Voltage-dependent anion-selective channel protein 1	VDAC1	30.772	3	5	1.1049	1.0287	0.143916	0.0408223
B4DSD4;Q8N4J0;Q5T8U9	UPF0586 protein C9orf41	C9orf41	22.498	5	4	1.1081	0.84061	0.148088	-0.250491
P78406;Q5J8M4;E9PQ57;E9PPG9	mRNA export factor	RAE1	40.968	12	10	1.1139	1.1284	0.15562	0.174279
E9PC15;B4E2Z8;A4D1U5;Q53H12;A0A0G2JLG5;E9PG39;B4DR72	Acylglycerol kinase, mitochondrial	AGK;FLJ10842	43.796	9	7	1.1147	0.92814	0.156655	-0.107586
P78527	DNA-dependent protein kinase catalytic subunit	PRKDC	469.08	23	17	1.1149	0.88143	0.156914	-0.182082
Q9Y446;E9PKC4	Plakophilin-3	PKP3	87.081	10	9	1.1223	0.99104	0.166458	-0.0129848
B2R659;A0A0S2Z4J1;P51659;E7ER27;B4DDM5;E7EWE5;B4DSD0;G5E9S2;B3KSP2;E7ET17;B4DI68	Peroxisomal multifunctional enzyme type 2;(3R)-hydroxyacyl-CoA dehydrogenase;Enoyl-CoA hydratase 2	HSD17B4	79.611	6	6	1.1244	0.68332	0.169155	-0.549367
A8KA05;Q9H9G7;B4DY67;B4E1P5	Protein argonaute-3;Protein argonaute	EIF2C3;AGO3	97.329	2	2	1.1269	1.2236	0.172359	0.291132
A0A090N8Z0;Q8TA86;A0A090N8G7	Retinitis pigmentosa 9 protein	RP9;LOC402478	26.106	5	3	1.13	1.1356	0.176323	0.183455
P49756;E9PQU5	RNA-binding protein 25	RBM25	100.18	3	4	1.13	0.92368	0.176323	-0.114535
J3KNL6;F1T0I1;O15027;A4QN18;A4QN19;A0A0C4DH09;X6RGP5	Protein transport protein Sec16A	SEC16A	251.89	12	9	1.1308	0.98396	0.177344	-0.0233284
E5KLK1;E5KLJ9;E5KLM1;E5KLJ7;E5KLL9;E5KLJ5;E5KLK2;E5KLK0;E5KLM2;E5KLM0;E5KLJ6;O60313;Q6PEK6	Dynamin-like 120 kDa protein, mitochondrial;Dynamin-like 120 kDa protein, form S1	OPA1	111.82	7	7	1.1311	0.94305	0.177726	-0.0845938
Q96AG4	Leucine-rich repeat-containing protein 59	LRRC59	34.93	5	5	1.136	0.94639	0.183963	-0.0794933
B3KM81;Q59E88;Q53G26;Q96EY1	DnaJ homolog subfamily A member 3, mitochondrial	DNAJA3	49.583	8	4	1.1364	1.0814	0.184471	0.1129
Q7LAX7;Q8TAE8	Growth arrest and DNA damage-inducible proteins-interacting protein 1	GADD45GIP1	14.494	2	3	1.1407	0.91133	0.189919	-0.133955
Q13501;E7EMC7;B4E3V2	Sequestosome-1	SQSTM1	47.687	4	3	1.1434	0.89304	0.19333	-0.163203
B3KQH5;A0A024RDU0;Q9UL03;G5E9X1	Integrator complex subunit 6	INTS6	80.511	4	2	1.1447	1.6429	0.19497	0.716245
Q53YD7;P26641	Elongation factor 1-gamma	EEF1G	50.118	5	4	1.1447	1.0073	0.19497	0.0104934
Q8NCF7;B2RE88;A0A024RBE8;A0A024RBH9;Q00325;F8VVM2;Q53HC3	Phosphate carrier protein, mitochondrial	SLC25A3	39.932	10	9	1.1502	0.82254	0.201885	-0.281842
Q32Q75;X5D7E3;D6RBW1;P06730	Eukaryotic translation initiation factor 4E	EIF4E	25.067	3	2	1.1509	0.93611	0.202762	-0.09525
V9HW26;P25705;K7EK77;K7ERX7;B4DGW3	ATP synthase subunit alpha;ATP synthase subunit alpha, mitochondrial	HEL-S-123m;ATP5A1	59.75	16	13	1.1551	0.92984	0.208018	-0.104946
V9HW79;O43175;Q5SZU1;B3KSC3;Q9UMY2	D-3-phosphoglycerate dehydrogenase	HEL-S-113;PHGDH;PGDH3	56.664	8	12	1.156	1.0368	0.209141	0.0521376
Q9UHF7;E5RFF3;E5RJ97	Zinc finger transcription factor Trps1	TRPS1	141.52	12	16	1.1573	0.99529	0.210763	-0.00681115
Q8WVV4	Protein POF1B	POF1B	68.064	11	7	1.1593	0.92023	0.213254	-0.119934
Q8IZ29;P68371;Q8N6N5;Q8IWP6;B3KML9;Q96HX0	Tubulin beta-4B chain	TUBB2C;TUBB4B	49.839	24	24	1.1596	0.90334	0.213627	-0.146659
Q01650;Q2MCL6	Large neutral amino acids transporter small subunit 1	SLC7A5	55.01	5	5	1.1603	0.77307	0.214498	-0.371329
Q99567;J3KMX1;B4DP20;B7Z5I6	Nuclear pore complex protein Nup88	NUP88	83.541	14	13	1.1611	1.0939	0.215492	0.129481
O75400;Q05C41;F5H578;H7C2N3;H0YG38;B4DPY2	Pre-mRNA-processing factor 40 homolog A	PRPF40A	108.8	3	3	1.165	0.97224	0.22033	-0.0406156
O15014	Zinc finger protein 609	ZNF609	151.19	10	6	1.166	0.79911	0.221568	-0.323534
P17858;Q9BSP4;Q7L2M7;B3KNQ7	ATP-dependent 6-phosphofructokinase, liver type	PFKL	85.018	7	10	1.1683	0.84593	0.224411	-0.24139
Q5JSZ5	Protein PRRC2B	PRRC2B	242.96	18	12	1.1709	0.89354	0.227618	-0.162396
B4DFL1;A0A024R713;P09622;E9PEX6;B4DMK9	Dihydrolipoyl dehydrogenase;Dihydrolipoyl dehydrogenase, mitochondrial	DLD	48.899	3	3	1.1711	1.2809	0.227864	0.357158
D6RAA6;A6QKW0;A0A024R9W7;P57088	Transmembrane protein 33	TMEM33;SHINC3	25.223	2	3	1.1724	1.1141	0.229465	0.155879
S4R3Q9;J3KNA0;Q15070;Q2M1J6;E7EVY0;C9JC63	Mitochondrial inner membrane protein OXA1L	OXA1L	48.519	6	4	1.1742	0.73352	0.231678	-0.447092
A0A024RA66;A0A024RA85;Q14004	Cyclin-dependent kinase 13	CDC2L5;CDK13	158.43	3	3	1.1784	1.116	0.236829	0.158337
B2RE46;P04844;B4DJL0	Dolichyl-diphosphooligosaccharide--protein glycosyltransferase subunit 2	RPN2	69.333	3	4	1.1804	0.82033	0.239276	-0.285724
P13674	Prolyl 4-hydroxylase subunit alpha-1	P4HA1	61.049	6	5	1.1822	0.60451	0.241474	-0.726162
A0A024R704;P78362	SRSF protein kinase 2;SRSF protein kinase 2 N-terminal;SRSF protein kinase 2 C-terminal	SRPK2	77.526	3	2	1.1829	1.5771	0.242328	0.657274
A0A1B0GVL4;P78312;D6RFZ4;E7EUR8;B7Z8P8	Protein FAM193A	FAM193A	166.37	2	3	1.1884	0.85411	0.249021	-0.227506
B3KT06;P68363;B3KPS3;A8JZY9;P68366;B4DDU2;B4DN58	Tubulin alpha-1B chain;Tubulin alpha-4A chain	TUBA1B;TUBA4A	46.341	20	21	1.191	0.96738	0.252173	-0.0478454
Q9Y2W1	Thyroid hormone receptor-associated protein 3	THRAP3	108.66	7	7	1.1913	0.80595	0.252537	-0.311238
J3KNN5;Q9UJV9;Q53HI2;B3KRK2	Probable ATP-dependent RNA helicase DDX41	DDX41	71.648	13	11	1.192	0.87405	0.253384	-0.194212
H7C0V5		ANKHD1-EIF4EBP3	66.134	2	2	1.1944	0.78286	0.256286	-0.353174
B2ZZ90;Q13085;A0A024R0Y2	Acetyl-CoA carboxylase 1;Biotin carboxylase	ACACA;hCG_30204	265.55	13	8	1.1955	0.95342	0.257614	-0.0688162
B4E1G1;A0A024R9G3;Q9BUN8;E5RGY0	Derlin-1	DERL1	17.033	4	4	1.2	0.88093	0.263034	-0.182901
A0A158SIU0;E7EQS8;Q6N021	Methylcytosine dioxygenase TET2	TET2	223.81	3	4	1.2027	0.96441	0.266277	-0.0522815
Q6IPT9;Q6IPS9;Q6IPN6;Q53HR5;Q53HQ7;Q53HM9;Q53GE9;Q53G85;Q5VTE0;P68104;Q53GA1;A8K9C4;B4DNE0;Q53G89;A0A087WVQ9;Q96RE1;B4DV42;Q9NZS6;A0A087WV01;Q9H2I7;Q05639;Q8IUB0;Q53HR1;Q16577	Elongation factor 1-alpha;Putative elongation factor 1-alpha-like 3;Elongation factor 1-alpha 1;Elongation factor 1-alpha 2	EEF1A1;EEF1A1P5;EEF1A1L14;EEF1A2;PTI-1	50.184	11	11	1.2064	1.0447	0.270708	0.0630887
B4DPS6;B4DUC5;P55060;B4DM67;B4DM31;B4DS32	Exportin-2	CSE1L	71.769	2	3	1.207	1.1339	0.271426	0.181293
Q66PJ3;A0A0C4DG62;F8WCT1;F8WEP2;A0A0C4DH18;F5GYV5;H7BZV4;B2RE15;Q8TEM4	ADP-ribosylation factor-like protein 6-interacting protein 4	ARL6IP4;FLJ00169	44.915	5	4	1.2079	0.93933	0.272501	-0.090296
I0CE67;Q6I9R8;Q2TSB7;Q2XQU9;J3KNW4;A0A0A0MSG2;Q14192;Q53T40	Four and a half LIM domains protein 2	FHL2;AAG11	30.949	8	7	1.2127	0.92342	0.278223	-0.114941
P49792	E3 SUMO-protein ligase RanBP2	RANBP2	358.2	10	14	1.2152	1.5039	0.281194	0.588709
H9ZYJ2;P10599	Thioredoxin	TXN	11.737	7	5	1.2189	0.81533	0.28558	-0.294544
Q5TDE9;Q9BSD7;Q5TDF0	Cancer-related nucleoside-triphosphatase	C1orf57;NTPCR	20.713	2	2	1.2194	0.92008	0.286171	-0.120169
B3KM97;Q9NZ01;M0R3C3;B3KSQ1	Very-long-chain enoyl-CoA reductase	TECR	36.053	5	5	1.2249	0.7246	0.292664	-0.464743
Q5FWY2;A0A0S2Z3S5;A0A0S2Z3H8;P63092;Q5JWF2;B0AZR9;Q14455	Guanine nucleotide-binding protein G(s) subunit alpha isoforms short;Guanine nucleotide-binding protein G(s) subunit alpha isoforms XLas	GNAS;GSA	44.25	3	3	1.229	1.097	0.297485	0.133564
B2RAQ8;A0A024R5F4;P50416	Carnitine O-palmitoyltransferase 1, liver isoform	CPT1A	88.339	8	6	1.2292	0.79686	0.29772	-0.327602
A0A075B6T1;B4DZ97;Q9C0C7;H0YE34	Activating molecule in BECN1-regulated autophagy protein 1	AMBRA1	129.6	2	2	1.2311	0.92956	0.299948	-0.10538
A0A0S2Z382;A0A0S2Z3G3;Q9UBX3;B4E1E9;A0A0S2Z3I3;F6RGN5;I3L1E8	Mitochondrial dicarboxylate carrier	SLC25A10	31.282	8	10	1.232	0.79665	0.301002	-0.327982
Q2NKY5		TUBB6	50.09	2	3	1.233	0.9778	0.302173	-0.0323887
P22695;H3BRG4;H3BSJ9	Cytochrome b-c1 complex subunit 2, mitochondrial	UQCRC2	48.442	6	7	1.2345	0.98308	0.303927	-0.0246193
B4DFE6;B4DL14;Q8TAS0;P36542	ATP synthase subunit gamma;ATP synthase subunit gamma, mitochondrial	ATP5C1	15.726	3	2	1.2379	1.072	0.307895	0.100305
M0R026;A1L0T0;Q59GP4	Acetolactate synthase-like protein	ILVBL	56.732	4	2	1.24	0.77088	0.31034	-0.375422
A0A024R5H0;O75531;B2R4V4	Barrier-to-autointegration factor;Barrier-to-autointegration factor, N-terminally processed	BANF1	10.058	4	4	1.2413	0.60107	0.311852	-0.734395
P41162	ETS translocation variant 3	ETV3	57.001	5	4	1.2418	0.72556	0.312433	-0.462833
A8K8U1;Q86VP6;A0A0C4DGH5	Cullin-associated NEDD8-dissociated protein 1	CAND1	136.32	13	12	1.2481	0.96762	0.319734	-0.0474875
A0A024R781;A0A024R776;A0A024R785;O95628;B3KQ99	CCR4-NOT transcription complex subunit 4	CNOT4	70.786	6	3	1.2509	0.81453	0.322966	-0.29596
Q13427;Q32LZ0;C9JN15;Q6P432;Q2NKQ6;E9PG73;C9JM79	Peptidyl-prolyl cis-trans isomerase G;Peptidyl-prolyl cis-trans isomerase	PPIG	88.616	6	8	1.2586	0.78184	0.33182	-0.355055
X5DNI9;A8K0D2;A0A024R5F7;Q9UBM7;A0A0S2Z3U5;E9PRL8;E9PQ71;E9PIP9;E9PJ54;A0A0S2Z3N8;X5D9E1;E9PM00;A0A0S2Z3S3;X5DRD7	7-dehydrocholesterol reductase	DHCR7	54.461	5	4	1.2587	0.78489	0.331934	-0.349438
Q0D2M2;B2R4S9;A8K9J7;A0A024RCL8;A0A024RCJ9;A0A024QZZ7;I6L9F7;U3KQK0;B4DR52;Q99880;Q99879;Q99877;Q93079;Q5QNW6;P62807;P58876;O60814;P57053;Q96A08	Histone H2B;Histone H2B type 1-L;Histone H2B type 1-M;Histone H2B type 1-N;Histone H2B type 1-H;Histone H2B type 2-F;Histone H2B type 1-C/E/F/G/I;Histone H2B type 1-D;Histone H2B type 1-K;Histone H2B type F-S;Histone H2B type 1-A	HIST1H2BC;HIST1H2BI;HIST1H2BK;HIST1H2BN;HIST1H2BD;HIST1H2BM;HIST1H2BL;HIST1H2BH;HIST2H2BF;H2BFS;HIST1H2BA	13.834	8	7	1.2593	1.3183	0.332622	0.398679
B4DEE8;P16455	Methylated-DNA--protein-cysteine methyltransferase	MGMT	25.05	4	3	1.2593	0.68384	0.332622	-0.548269
F5H5D3;Q9BQE3;Q53GA7;B7Z1K5;Q8N532;A0A1W2PQM2	Tubulin alpha-1C chain	TUBA1C	57.73	2	3	1.2606	0.72907	0.334111	-0.455871
A0A0A0MRE5;Q9ULH1;H0YBF7	Arf-GAP with SH3 domain, ANK repeat and PH domain-containing protein 1	ASAP1	124.77	14	7	1.261	0.84656	0.334568	-0.240316
A8K525;A0A0S2Z4Z9;Q15233;H7C367	Non-POU domain-containing octamer-binding protein	NONO	54.287	7	5	1.2656	1.4351	0.339822	0.521151
Q5RZ99;Q5RZA0;O95831	Apoptosis-inducing factor 1, mitochondrial	AIFM1	24.425	2	2	1.2677	0.80803	0.342213	-0.307519
A0A140VKH3;Q9ULX6	A-kinase anchor protein 8-like	AKAP8L	71.648	2	4	1.2729	1.1094	0.348119	0.14978
P09382	Galectin-1	LGALS1	14.716	4	4	1.2802	2.2657	0.356369	1.17996
P49411	Elongation factor Tu, mitochondrial	TUFM	49.541	16	13	1.2836	0.76785	0.360196	-0.381104
Q02338;C9K0G7;E9PCG9;C9JM78;C9JQ90;A0A0G2JRX6;H7C2W1	D-beta-hydroxybutyrate dehydrogenase, mitochondrial	BDH1	38.157	6	7	1.2852	1.0126	0.361993	0.0180644
B2RA03;A0A024RAY2;P05783;F8VZY9;I6L965	Keratin, type I cytoskeletal 18	KRT18	48.029	18	20	1.2871	0.93056	0.364124	-0.103829
O95218	Zinc finger Ran-binding domain-containing protein 2	ZRANB2	37.404	5	3	1.2936	0.85701	0.371392	-0.222616
Q06830;A0A0A0MSI0;B2R4P2	Peroxiredoxin-1	PRDX1	22.11	12	13	1.2939	1.1976	0.371726	0.260146
Q9P0W2;A8K0D5;B5MDG7;A4IF61;C9K049;C9J8X5	SWI/SNF-related matrix-associated actin-dependent regulator of chromatin subfamily E member 1-related	HMG20B	35.812	8	8	1.2943	0.89541	0.372172	-0.15938
A0A024R4E9;Q9P2R6;H7BYW9	Arginine-glutamic acid dipeptide repeats protein	RERE	172.42	4	4	1.2955	0.97244	0.373509	-0.0403189
Q01813;Q8WTZ9	ATP-dependent 6-phosphofructokinase, platelet type	PFKP	85.595	14	12	1.2958	0.89201	0.373843	-0.164868
Q14671;H0YEH2;Q5T1Z4;Q5T1Z8;E9PR38;B4DU15;H0YDK8;B3KU37	Pumilio homolog 1	PUM1	126.47	11	13	1.2988	0.85154	0.377179	-0.231854
B4DSA4;Q7KZA3;Q53FU1;Q5TZY0;P22830	Ferrochelatase;Ferrochelatase, mitochondrial	DKFZp686P18130;FECH	32.283	6	5	1.2991	1.0301	0.377512	0.0427844
P46109	Crk-like protein	CRKL	33.777	5	5	1.3002	0.95295	0.378734	-0.0695276
B4DVN1;A0A0J9YX62;O75190;C9J2C4;A7UJ17;C9JB42;C9JDR7;C9JDX6;F8WCZ4;C9J2P2;B4DNF1;E9PH18;B4DMJ9;B4DNN5	DnaJ homolog subfamily B member 6	DNAJB6	29.487	5	5	1.302	0.91145	0.380729	-0.133765
Q9BSV4;Q86VG2;P23246;Q6PIX2	Splicing factor, proline- and glutamine-rich	SFPQ	68.63	4	5	1.3048	1.5149	0.383829	0.599223
V9HWA6;P60981;B7Z9M9;F6RFD5	Destrin	HEL32;DSTN	18.506	2	4	1.3093	0.98123	0.388796	-0.0273368
C9J7T7;C9JE98;A0A024RBU9;C9J0Q5;C9JFD3;A0A024RBS3;Q9Y618	Nuclear receptor corepressor 2	NCOR2	221	16	9	1.3111	0.90391	0.390778	-0.145749
Q8IXB1;B4DP04;B3KNK5;Q8N4C5	DnaJ homolog subfamily C member 10	DNAJC10	91.079	5	5	1.3137	1.1236	0.393636	0.168129
J3QS41;B7ZLW2;A0A024R8K8;P42694	Probable helicase with zinc finger domain	HELZ	219.05	51	48	1.3151	0.90956	0.395173	-0.136759
V9HWE7;P51570;Q6ZP37;Q71UH7	Galactokinase	HEL-S-19;GALK1	42.272	7	7	1.3155	0.88206	0.395611	-0.181051
Q59GQ7;A0A0C4DGA6;Q14527;Q05DF7;A8K5B6;Q05BZ6;Q05DQ5	Helicase-like transcription factor	HLTF	111.97	4	4	1.3168	0.97225	0.397036	-0.0406008
Q5JP53;Q5SU16;P07437;B7ZAF0;Q6LC01;B4DY90;Q5ST81;B7ZAK1;Q9BUU9;B4E052;B4DQN9;B4DMU8;Q96B85;B4DXZ5;Q1KSF8;B4DMJ5	Tubulin beta chain	TUBB;XTP3TPATP1	47.766	6	6	1.3174	0.88944	0.397693	-0.169031
Q5T0W9	Protein FAM83B	FAM83B	114.8	15	14	1.3174	0.88681	0.397693	-0.173303
P42677;Q5T4L4;A4D1G5	40S ribosomal protein S27	RPS27;LOC392748	9.461	4	5	1.3176	0.92406	0.397912	-0.113942
B0QYK0;Q01844;A0A0D9SFL3;C9JGE3;H7BY36	RNA-binding protein EWS	EWSR1	64.929	6	5	1.319	0.63978	0.399445	-0.644352
E9PPR1;E9PL12;E9PQ49;E9PI39;E9PK01;A0A087X1X7;Q71RH4;Q9H7G6;D3DWK1;B2RAR6;E9PRY8;P29692;E9PMW7;E9PIZ1;E9PK06;E9PL71;H0YCK7;E9PQZ1;Q9BW34	Elongation factor 1-delta	EEF1D	18.157	2	3	1.3213	0.99253	0.401958	-0.0108174
B7Z597;A0A024R3X4;P10809;B7Z5E7;B3GQS7;B7Z4F6	60 kDa heat shock protein, mitochondrial	HSPD1	60.047	7	8	1.3233	1.8819	0.40414	0.91219
A0A0S2Z565;A0A0S2Z591;O00165;E9PIQ7	HCLS1-associated protein X-1	HAX1	26.099	2	3	1.3303	0.78742	0.411752	-0.344795
B7Z6N1;A0A024R0L4;P50548	ETS domain-containing transcription factor ERF	ERF	57.436	3	2	1.3307	0.78002	0.412185	-0.358417
A8K8D9;P11413;Q2VF42;Q2Q9H2;Q2Q9B7;B4DYA7;Q0PHS1;E7EUI8	Glucose-6-phosphate 1-dehydrogenase	G6PD	59.314	11	9	1.331	0.87653	0.412511	-0.190125
B2RBA6;A0A0S2Z4A5;P33993;C6EMX8;B3KUD7;B4DDF5;Q9H4N9	DNA helicase;DNA replication licensing factor MCM7	MCM7	81.279	11	13	1.3337	1.1763	0.415434	0.234256
Q14687;H0Y613;Q59GZ0	Genetic suppressor element 1	GSE1	136.16	25	21	1.3394	0.82444	0.421587	-0.278514
A0A0U1RQH7;G3XAC6;B4DRA0;B4DLM0;B3KWX7;Q68DD9;B4E1M7;Q14498;B7Z4L7;Q6N037;E1P5S2;Q7Z3L0;Q6MZY7;A0A0U1RQW2;H0Y4X3	RNA-binding protein 39	RBM39;DKFZp781C0423;DKFZp686A11192;RNPC2;DKFZp781I1140;DKFZp686C17209	26.698	11	9	1.3419	0.80842	0.424277	-0.306823
A0A0U1RQF0;P49327	Fatty acid synthase;[Acyl-carrier-protein] S-acetyltransferase;[Acyl-carrier-protein] S-malonyltransferase;3-oxoacyl-[acyl-carrier-protein] synthase;3-oxoacyl-[acyl-carrier-protein] reductase;3-hydroxyacyl-[acyl-carrier-protein] dehydratase;Enoyl-[acyl-carrier-protein] reductase;Oleoyl-[acyl-carrier-protein] hydrolase	FASN	273.2	24	27	1.3468	0.95739	0.429536	-0.0628214
A0A024R1K0;Q9NRA8;B1AKL4;B4DR76	Eukaryotic translation initiation factor 4E transporter	EIF4ENIF1	108.2	11	12	1.3513	0.72911	0.434348	-0.455792
Q03252;A0A0A7M1X5	Lamin-B2	LMNB2	69.948	4	5	1.356	1.8772	0.439357	0.908582
E7ET15;O15042;H7C4V2;B4DK81;E7EW00;H0Y8D9	U2 snRNP-associated SURP motif-containing protein	U2SURP	118.25	2	2	1.3606	0.83227	0.444243	-0.264876
A0A024R7F9;Q92947;A0A1L3A5U7;B4DK85;B4DUY0;A0A1L3A5T2	Glutaryl-CoA dehydrogenase, mitochondrial	GCDH	48.127	9	6	1.3617	0.77788	0.445409	-0.36238
O60341;A8K2R3	Lysine-specific histone demethylase 1A	KDM1A	92.902	14	16	1.3623	0.8542	0.446044	-0.227354
A0A024R5R8;Q9H5Q4	Dimethyladenosine transferase 2, mitochondrial	TFB2M	27.151	2	2	1.3648	0.86495	0.44869	-0.209311
Q9H3K6;A0A087WZT3	BolA-like protein 2	BOLA2	10.116	4	4	1.3649	0.81324	0.448795	-0.298247
A0A087WTP3;Q92945;M0QYH3;M0R0I5;B4DV73	Far upstream element-binding protein 2	KHSRP	73.027	3	4	1.366	0.53365	0.449957	-0.906034
A0A024R5M3;Q53HG7;Q14247;Q76MU0	Src substrate cortactin	CTTN;EMS1	57.466	5	6	1.3662	1.11	0.450169	0.15056
V9HW43;P04792;B4DL87	Heat shock protein beta-1	HEL-S-102;HSPB1	22.782	16	14	1.3667	0.84375	0.450697	-0.245112
A0A024R5C5;P11498;E9PRE7	Pyruvate carboxylase;Pyruvate carboxylase, mitochondrial	PC	129.63	8	11	1.378	0.97676	0.462576	-0.033924
D7PBN3			118.62	2	2	1.3785	1.1051	0.463099	0.144177
B4E3J6;A0A024RDW4;Q9NWB6	Arginine and glutamate-rich protein 1	FLJ10154;ARGLU1	26.6	5	4	1.3852	0.90216	0.470094	-0.148545
B3VCF8;H7C0V3;B3VCF6;B3VCF4;B7Z215;B7Z701;B7Z1W9;B7Z1V0;B7Z232;P52757	Beta-chimaerin	CHN2	11.369	1	1	1.3857	0.62457	0.470615	-0.679065
Q14157;B4DYY5;F8W726;B4DZJ6	Ubiquitin-associated protein 2-like	UBAP2L	114.53	18	16	1.3885	0.88993	0.473527	-0.168236
V9HW63;Q13162	Peroxiredoxin-4	HEL-S-97n;PRDX4	30.54	2	2	1.3886	0.9162	0.473631	-0.126266
Q8NDV7	Trinucleotide repeat-containing gene 6A protein	TNRC6A	210.29	33	27	1.3929	0.83957	0.478092	-0.252277
F5H2F4;B7Z809;A0A024R652;P11586	C-1-tetrahydrofolate synthase, cytoplasmic;Methylenetetrahydrofolate dehydrogenase;Methenyltetrahydrofolate cyclohydrolase;Formyltetrahydrofolate synthetase;C-1-tetrahydrofolate synthase, cytoplasmic, N-terminally processed	MTHFD1	110.61	11	11	1.3945	0.94722	0.479748	-0.0782286
H7C269		TNRC6A	98.629	2	2	1.3998	0.79888	0.485221	-0.323949
Q9H7S9	Zinc finger protein 703	ZNF703	58.221	4	2	1.402	0.96199	0.487486	-0.0559062
Q8NE02;O43823;Q9UG73	A-kinase anchor protein 8	AKAP8;DKFZp586B1222	76.165	8	6	1.4102	0.93662	0.4959	-0.0944643
E1NZA1;Q92616;A0A024RBS1	Translational activator GCN1	PRIC295;GCN1L1	292.74	12	10	1.4148	0.85866	0.500598	-0.219841
O75420;A2VDH9;A4D2E1	PERQ amino acid-rich with GYF domain-containing protein 1	GIGYF1;PERQ1	114.6	9	10	1.4234	0.76891	0.509341	-0.379113
Q70EL1;Q6ZSX9;B4E129	Inactive ubiquitin carboxyl-terminal hydrolase 54	USP54	187.39	14	15	1.4245	0.8621	0.510456	-0.214073
A0A024R8B6;P35658;A0A0A0MSW3;Q7Z3C4	Nuclear pore complex protein Nup214	NUP214;DKFZp686J0330	218.17	35	34	1.4282	0.82225	0.514198	-0.282351
Q9NYF8;E9PK91;Q6DCA8;A0A1W2PQ43;E9PK09;E9PQN2;E9PKI6;E9PJA7	Bcl-2-associated transcription factor 1	BCLAF1	106.12	16	11	1.4286	0.68904	0.514602	-0.53734
Q9UJY1;H0YG30	Heat shock protein beta-8	HSPB8	21.604	12	10	1.4473	1.0315	0.533364	0.0447438
P02545;W8QEH3;Q5I6Y5;Q3BDU5;Q8N519;Q5TCI8	Prelamin-A/C;Lamin-A/C	LMNA	74.139	32	34	1.449	0.58332	0.535058	-0.777641
O95470	Sphingosine-1-phosphate lyase 1	SGPL1	63.523	4	5	1.45	0.71786	0.536053	-0.478226
Q96AF9;B4DQR8;Q28617;B4DY85;H0Y2Y8;Q9BUS0;Q15942;C9JJK5	Zyxin	ZYX	50.472	3	3	1.4509	0.92121	0.536948	-0.118398
Q1W6G4;Q9NQ29;Q53G47;A8MYV2;B8ZZ10;D3DU41	Putative RNA-binding protein Luc7-like 1	LUC7L	38.405	4	6	1.4743	0.55233	0.56003	-0.856398
V9HWI5;P23528;G3V1A4;E9PP50;E9PK25;B4E112;E9PQB7	Cofilin-1	HEL-S-15;CFL1	18.502	3	5	1.4852	0.87324	0.570657	-0.19555
A8K5Y7;Q9HAV4;E2QRM3;Q9H8N6;B3KNC6;B3KPQ5	Exportin-5	XPO5	136.31	2	3	1.496	0.79667	0.58111	-0.327946
P27694;I3L4R8	Replication protein A 70 kDa DNA-binding subunit;Replication protein A 70 kDa DNA-binding subunit, N-terminally processed	RPA1	68.137	2	4	1.4988	0.54426	0.583808	-0.877632
A0A024R4A5;Q6Y7W6;I1E4Y6	PERQ amino acid-rich with GYF domain-containing protein 2	TNRC15;GIGYF2	149.94	10	8	1.4992	0.78024	0.584193	-0.35801
Q15654;F2ZC06;Q71V88;A0A0D9SFS2;Q68D94	Thyroid receptor-interacting protein 6	TRIP6;TRIP6i1;DKFZp686J22257	50.287	11	8	1.5003	1.0333	0.585251	0.0472592
P20700;E9PBF6;Q6DC98;A0A0D9SFE5	Lamin-B1	LMNB1	66.408	27	23	1.5007	0.71537	0.585636	-0.483238
P50402	Emerin	EMD	28.994	4	4	1.5246	0.62314	0.608431	-0.682372
A0A140VK29;Q9HCC0;D6R9R1;D6RDF7;A0A0S2Z5R4;A0A0G2JM88;B3KR24	Methylcrotonoyl-CoA carboxylase beta chain, mitochondrial	MCCC2	61.332	6	5	1.525	0.83389	0.608809	-0.262071
Q9UKL0	REST corepressor 1	RCOR1	53.327	8	8	1.5266	0.75828	0.610322	-0.399197
O95817;Q53GY1	BAG family molecular chaperone regulator 3	BAG3	61.594	31	27	1.5293	0.76191	0.612871	-0.392308
P23771	Trans-acting T-cell-specific transcription factor GATA-3	GATA3	47.915	9	8	1.5371	0.75901	0.620211	-0.397809
M0QXN5;A0A024QZF1;P37198	Nuclear pore glycoprotein p62	NUP62;hCG_19665	45.615	3	2	1.5414	1.0951	0.624241	0.131063
Q5XUX0;A0A0C4DGU8	F-box only protein 31	FBXO31	60.663	8	8	1.5422	0.94657	0.62499	-0.0792189
Q6UUV7;Q8TEF4	CREB-regulated transcription coactivator 3	CRTC3;FLJ00243	66.958	5	4	1.5494	0.79547	0.63171	-0.330121
V9HWF5;A8K486;P62937;B2RE56;F8WE65;C9J5S7;Q71V99;B4DM82	Peptidyl-prolyl cis-trans isomerase;Peptidyl-prolyl cis-trans isomerase A;Peptidyl-prolyl cis-trans isomerase A, N-terminally processed	HEL-S-69p;PPIA	18.012	7	6	1.5511	1.0225	0.633292	0.0321008
Q9Y3Z3	Deoxynucleoside triphosphate triphosphohydrolase SAMHD1	SAMHD1	72.2	2	3	1.5531	1.0061	0.635151	0.00877371
B3KRJ9;Q69YM5;Q8WXA9	Splicing regulatory glutamine/lysine-rich protein 1	DKFZp667P103;SREK1	58.202	4	3	1.5567	0.82445	0.638491	-0.278496
A0A087WZ13;E9PAU2		RAVER1	77.843	4	4	1.5618	0.64682	0.64321	-0.628564
B4DWI8;Q8WXF1;A0A024RDP4	Paraspeckle component 1	PSPC1	52.579	2	2	1.5623	1.0768	0.643672	0.10675
A0A024RCC4;P52948;A8KA17;B4DWF8	Nuclear pore complex protein Nup98-Nup96;Nuclear pore complex protein Nup98;Nuclear pore complex protein Nup96	NUP98	141.4	8	10	1.5667	0.90556	0.647729	-0.143118
A0A024R1T4;H0Y720		TNRC6B	162.17	29	31	1.5833	0.83754	0.662935	-0.25577
C9JZG2;C9JKQ7;C9JBJ1;C9JTV6;F8WD69;Q15374;Q3B7A7;Q59HH3;P22102	Trifunctional purine biosynthetic protein adenosine-3;Phosphoribosylamine--glycine ligase;Phosphoribosylformylglycinamidine cyclo-ligase;Phosphoribosylglycinamide formyltransferase	GART	14.46	3	3	1.5914	1.1301	0.670297	0.17645
P55081	Microfibrillar-associated protein 1	MFAP1	51.958	3	3	1.6119	0.46212	0.688762	-1.11366
A0A024QZY5;Q13523;B4DZQ5;H0YDJ3	Serine/threonine-protein kinase PRP4 homolog	PRPF4B	116.99	7	8	1.6124	0.58607	0.68921	-0.770855
A0A024R0Q5;Q8WUF5;Q6ZNZ8	RelA-associated inhibitor	PPP1R13L	89.09	12	12	1.6342	0.75428	0.708585	-0.406828
H0Y494;A1A5A9;B3KVE2		SIK3;KIAA0999	138.58	7	9	1.6496	0.72042	0.722116	-0.47309
A8K3C5;O95232;Q6PKC2;Q86Y74;B4DJ96;J3KPP4	Luc7-like protein 3	LUC7L3;CROP	51.442	2	4	1.6573	1.0679	0.728835	0.0947766
P0DN76;Q01081;B5BU08;Q7Z780	Splicing factor U2AF 35 kDa subunit	U2AF1	27.872	5	6	1.6591	0.57547	0.730401	-0.797187
Q96FS1;C9JZR2;O60716;Q7KZJ3;A0A024R4Z0;Q68DU0;A0A024R4Y7	Catenin delta-1	CTNND1;DKFZp781O2021	92.387	2	3	1.6595	0.77958	0.730749	-0.359231
Q0IIN7;Q569F6;Q9Y6Q9;A8K0W8;Q59EE8;B4DYT5	Nuclear receptor coactivator 3	NCOA3	154.76	28	25	1.6828	0.79974	0.750864	-0.322397
Q69YM3;A0A024QZ86;Q13207	T-box transcription factor TBX2	DKFZp762H2012;TBX2	68.889	3	3	1.6941	0.76289	0.760519	-0.390453
A0A024RCZ1;Q8NC56;H7C2Z0	LEM domain-containing protein 2	LEMD2	56.974	2	3	1.7362	0.58123	0.795933	-0.782819
Q9Y383;B3KSL5;A0A0A6YYJ8;B3KRR1	Putative RNA-binding protein Luc7-like 2	LUC7L2	46.513	13	13	1.769	0.61779	0.822934	-0.694812
B5BU25;P26368;K7ENG2	Splicing factor U2AF 65 kDa subunit	U2AF2	53.136	3	6	1.782	0.66137	0.833497	-0.59647
B4DW25;B4E1G2;Q5HYG8;B4DJQ3;A0A024RB99;V9HW06;Q53ET4;P34897;H0YIZ0;B4DJ63;B4DLV4;B4DP88;Q5BJF5;B4DWA7	Serine hydroxymethyltransferase;Serine hydroxymethyltransferase, mitochondrial	DKFZp686P09201;SHMT2;HEL-S-51e	47.843	2	2	1.7916	0.18102	0.841249	-2.46578
A8K6X3;A0A0C4DG89;Q7L014;D3DQA6	Probable ATP-dependent RNA helicase DDX46	DDX46	117.47	11	8	1.8634	0.66748	0.897937	-0.583203
A8KAQ5;A0A024QZD5;P08621;M0QYR1	U1 small nuclear ribonucleoprotein 70 kDa	SNRP70;SNRNP70	51.495	3	3	1.8782	0.54405	0.909351	-0.878189
Q05BU6;Q6PJY9;Q6PKC9;Q5T760;Q6PJB9;Q05519;B4DWT1;B4DTC1	Serine/arginine-rich splicing factor 11	SFRS11;SRSF11	24.847	2	4	2.0202	0.78774	1.0145	-0.344209
J3QK89;Q8IWX8;B4DPM4	Calcium homeostasis endoplasmic reticulum protein	CHERP	104.93	5	4	2.0465	0.61207	1.03316	-0.708231
B7ZBM3;Q8IVH2	Forkhead box protein P4	FOXP4	72.286	4	3	2.2283	2.2326	1.15594	1.15872
A0A0J9YYL3;A0A0J9YVP6;A0A0J9YXJ8;A0A0J9YXX5;Q9UHX1;A0A0J9YVR6;E9PQ56;E9PN18;A0A0J9YWM1;H0YEM1	Poly(U)-binding-splicing factor PUF60	PUF60	54.626	3	7	2.3032	0.70591	1.20364	-0.502444
A0A0S2Z4W1;A9Z1X7;B7Z7U0;A0A0S2Z4Z6;Q8IYB3;E9PCT1	Serine/arginine repetitive matrix protein 1	SRRM1	102.33	5	7	2.3902	0.38007	1.25713	-1.39566
Q08AJ9;A0A024R017;Q93077;Q7L7L0;P04908;A3KPC7;A0A024RAS2;B2R5B3;A4FTV9;A0A0U1RR32;A0A0U1RRH7;Q99878;Q96KK5;Q9BTM1;Q16777;Q6FI13;P20671;P0C0S8;H0YFX9;B4E0B3;B2R5B6;Q96QV6;P16104	Histone H2A;Histone H2A type 1-C;Histone H2A type 3;Histone H2A type 1-B/E;Histone H2A type 1-J;Histone H2A type 1-H;Histone H2A.J;Histone H2A type 2-C;Histone H2A type 2-A;Histone H2A type 1-D;Histone H2A type 1;Histone H2A type 1-A;Histone H2AX	HIST1H2AB;HIST1H2AC;HIST3H2A;HIST1H2AH;H2AFJ;HIST1H2AK;HIST1H2AJ;HIST2H2AC;HIST2H2AA3;HIST1H2AD;HIST1H2AG;HIST1H2AA;H2AFX	14.135	2	4	2.4165	3.6136	1.27292	1.85344
Q9Y6A4	Cilia- and flagella-associated protein 20	CFAP20	22.774	2	2	2.4298	0.57124	1.28084	-0.807831
E5RJR5;P63208	S-phase kinase-associated protein 1	SKP1	18.72	6	4	2.6556	0.56634	1.40904	-0.82026
Q8IVT2	Mitotic interactor and substrate of PLK1	MISP	75.356	2	4	2.8453	1.7536	1.50858	0.81032
X6R700;Q9Y3Y2;A0A087X1B7	Chromatin target of PRMT1 protein	CHTOP	23.661	2	3	2.931	0.83186	1.55139	-0.265587
B3KTW0;B4DLA3;A0A0C4DGX4;A0A090N7U0;Q13616;Q75MQ1	Cullin-1	CUL1	69.885	5	5	2.9997	0.88692	1.58482	-0.173124
H0YIE9;A0A024RBL8;A0A024RBR2;O94952;Q8IUQ5;Q4G104;B3KQC8	F-box only protein 21	FBXO21	59.162	5	3	3.4715	0.37253	1.79556	-1.42457
M0QY97;Q9UPT8	Zinc finger CCCH domain-containing protein 4	ZC3H4	95.425	6	5	4.2591	0.26007	2.09055	-1.94303
Q9NZT1	Calmodulin-like protein 5	CALML5	15.892	3	1	5.5149	1.1695	2.46333	0.225892
B2R6A3;O14745;J3QRP6;B3KSV9	Na(+)/H(+) exchange regulatory cofactor NHE-RF;Na(+)/H(+) exchange regulatory cofactor NHE-RF1	SLC9A3R1	38.898	2	3	7.8242	0.24213	2.96794	-2.04615
